## RESEARCH ARTICLE

# *aura* (*mid1ip1l*) regulates the cytoskeleton at the zebrafish egg-to-embryo transition

Celeste Eno, Bharti Solanki and Francisco Pelegri\*

## ABSTRACT

Embryos from females homozygous for a recessive maternal-effect mutation in the gene *aura* exhibit defects including reduced cortical integrity, defective cortical granule (CG) release upon egg activation, failure to complete cytokinesis, and abnormal cell wound healing. We show that the cytokinesis defects are associated with aberrant cytoskeletal reorganization during furrow maturation, including abnormal F-actin enrichment and microtubule reorganization. Cortical F-actin prior to furrow formation fails to exhibit a normal transition into F-actin-rich arcs, and drug inhibition is consistent with *aura* function promoting F-actin polymerization and/or stabilization. In mutants, components of exocytic and endocytic vesicles, such as Vamp2, Clathrin and Dynamin, are sequestered in unreleased CGs, indicating a need for CG recycling in the normal redistribution of these factors. However, the exocytic targeting factor Rab11 is recruited to the furrow plane normally at the tip of bundling microtubules, suggesting an alternative anchoring mechanism independent of membrane recycling. A positional cloning approach indicates that the mutation in *aura* is associated with a truncation of Mid1 interacting protein 1 like (Mid1ip1l), previously identified as an interactor of the X-linked Opitz G/BBB syndrome gene product Mid1. A Cas9/CRISPR-induced mutant allele in *mid1ip1l* fails to complement the originally isolated *aura* maternal-effect mutation, confirming gene assignment. Mid1ip1l protein localizes to cortical F-actin aggregates, consistent with a direct role in cytoskeletal regulation. Our studies indicate that maternally provided *aura* (*mid1ip1l*) acts during the reorganization of the cytoskeleton at the egg-to-embryo transition and highlight the importance of cytoskeletal dynamics and membrane recycling during this developmental period.

**KEY WORDS:** Mid1, Mid1ip1l, Cytoskeleton, Cortical granules, Membrane exocytosis, Cytokinesis, F-actin, Zebrafish, Opitz G/BBB syndrome

## INTRODUCTION

The egg-to-embryo transition in the zebrafish involves multiple cytoskeletal changes, such as the reorganization of the egg cortex, ooplasmic streaming and the preparation of the cytoskeleton for cell division. The zebrafish egg cortex is composed of a meshwork of actin filaments (Hart and Collins, 1991; Becker and Hart, 1996). During oogenesis, membrane-bound cortical granules (CGs) accumulate throughout this egg cortex (Hart et al., 1987; Mei et al., 2009), and activation of the egg through water

exposure triggers rapid granule exocytosis (Hart and Collins, 1991; Becker and Hart, 1999). Upon exocytosis, released CG products promote the lifting and hardening of the chorion (Wessel and Wong, 2009).

Inhibition or stabilization of the actin network leads to enhanced or reduced CG release, respectively, suggesting that the F-actin cytoskeleton acts as a physical barrier that needs to be remodeled and dismantled to allow for CG release. As CGs exocytose, membrane must be retrieved, presumably through a process such as Clathrin-mediated endocytosis (Bement et al., 2000; Tsai et al., 2011), and indeed both Clathrin and Dynamin have been found to localize to at least a subset of CGs (Faire and Bonder, 1993; Kanagaraj et al., 2014). After exocytosis, F-actin undergoes rapid reassembly to enclose the edges of endocytosing crypts at sites of previous exocytotic events (Becker and Hart, 1999).

During embryonic cell division, the cytoskeleton is involved in the formation and resolution of cell boundaries between blastomeres (Rappaport, 1996). During furrow formation, zebrafish blastomeres form an F-actin-based contractile ring (Urven et al., 2006; Li et al., 2008; Webb et al., 2014), as well as pericleavage actin enrichments on both sides of the furrow, which converge to generate adhesive cell walls. The microtubule apparatus also undergoes stereotypic rearrangements during furrow formation (Jesuthasan, 1998; Urven et al., 2006). At the time of furrow initiation, microtubules derived from spindle asters reorganize into an array of bundles parallel to each other and perpendicular to the furrow, termed the furrow microtubule array (FMA) (Danilchik et al., 1998; Jesuthasan, 1998). As the furrow matures, FMA bundles become enriched at distal ends of the furrow while acquiring a characteristic tilting angle, pointing distally. Subsequently, distally located FMA bundles undergo disassembly.

Vesicular delivery of structural proteins and membrane is necessary to prevent the furrow from regressing (Danilchik et al., 1998, 2003; Jesuthasan, 1998; Pelegri et al., 1999), and microtubules act as substrates for the trafficking of Rab11-positive vesicles to the membrane (Takahashi et al., 2012). In the early zebrafish embryo, SNARE-mediated vesicle fusion required for membrane remodeling during cytokinesis relies on microtubules of the FMA and pericleavage F-actin enrichments (Li et al., 2006).

Here, we characterize the role of *aura* in early embryonic development, in processes that include plasma membrane integrity and CG release after egg activation, cell wound healing and cytokinesis. We show that *aura* encodes Mid1ip1l, a maternally provided zebrafish homolog of Mid1 interacting protein 1 (Mid1ip1), a protein that interacts with Mid1, which in humans is the product of the X-linked Opitz G/BBB syndrome causal gene. Our studies indicate a role for maternal *aura* (*mid1ip1l*) in the reorganization of the cytoskeleton at the egg-to-embryo transition, and highlight the importance of cytoskeletal dynamics and membrane recycling for early embryonic development.

Laboratory of Genetics, University of Wisconsin – Madison, 425-G Henry Mall, Room 2455 Genetics, Madison, WI 53706, USA.

\*Author for correspondence (fjpelegri@wisc.edu)

Received 9 September 2015; Accepted 1 March 2016

## RESULTS

**Effects of a mutation in *aura* at the egg-to-embryo transition**

Embryos from females homozygous for a mutation in *aura*, for simplicity referred to here as *aura* mutants, exhibit complete embryonic lethality due to a variety of defects (Pelegrí et al., 2004) (Fig. 1, Fig. S1A,B). In the most severely affected clutches, a significant fraction of embryos or activated eggs undergo lysis immediately after laying (Fig. 1A,B), suggesting a defect in egg membrane integrity. In eggs that do not undergo lysis, *aura* mutants typically exhibit abnormal yolk morphology. In wild type, the yolk is present as discrete granules in the mature egg (Fig. 1G), which coalesce during egg activation (Fig. 1C, 2-cell). In *aura* mutants, the yolk resembles that in the mature oocyte (Fig. 1D, 2-cell), suggesting a defect in yolk coalescence. In addition, *aura* mutant eggs and embryos often show pockets of ooplasm trapped between membrane and an indented yolk cortex (Fig. 1E, arrow). Blastodisc lifting, a result of ooplasmic streaming during the first few cell cycles (Hisaoaka and Firlit, 1960; Leung et al., 2000; Fernández et al., 2006; Fuentes and Fernández, 2010), is mildly reduced in *aura* mutants (Fig. S2A,B). *aura* mutants also exhibit a mild reduction in chorion expansion and integrity during the first cell cycle (Fig. S2C–E, see below). During oogenesis, yolk granule and CG distribution (Fig. S2F–I), as well as enrichment of F-actin and

formation of the mitochondrial cloud (Marlow and Mullins, 2008; Gupta et al., 2010), appear normal (Fig. S3A–D).

Fertilized *aura* mutant embryos exhibit defective cell division. In wild type, the region between the two central blastomeres (corresponding to the furrow for the first cell cycle) exhibits, by the 8-cell stage, a clearly visible membrane septum (Fig. 1C, 8-cell), which contributes to cell-cell adhesion. In *aura* mutants, furrows ingress normally, generating a normal cleavage pattern (Fig. 1D, 4-cell; Fig. S3E,F). However, at a time corresponding to the 8-cell stage, when the furrow for the first cell cycle should have undergone completion, *aura* mutants display no clearly defined septum and instead exhibit either the initial rounded morphology corresponding to the ingressing blastomeres or regress (Fig. 1D, 8-cell; Fig. S3G,H).

At a time when wild-type embryos are forming a cellularized blastula, *aura* mutants contain irregularly sized blastomeres and rounded cells at the surface (Fig. 1, 64-cell; Fig. S3G,H). When wild-type embryos display a mass of cells on top of the yolk at the 512-cell and 1000-cell stages (Fig. 1C), *aura* mutants are either fully syncytial or display pockets of cells aggregated atop a syncytial region (Fig. 1D, 256-cell and 1000-cell), resembling other cell division mutants (Pelegrí et al., 1999; Dosch et al., 2004; Yabe et al., 2009). At a time coincident with the initiation of epiboly in

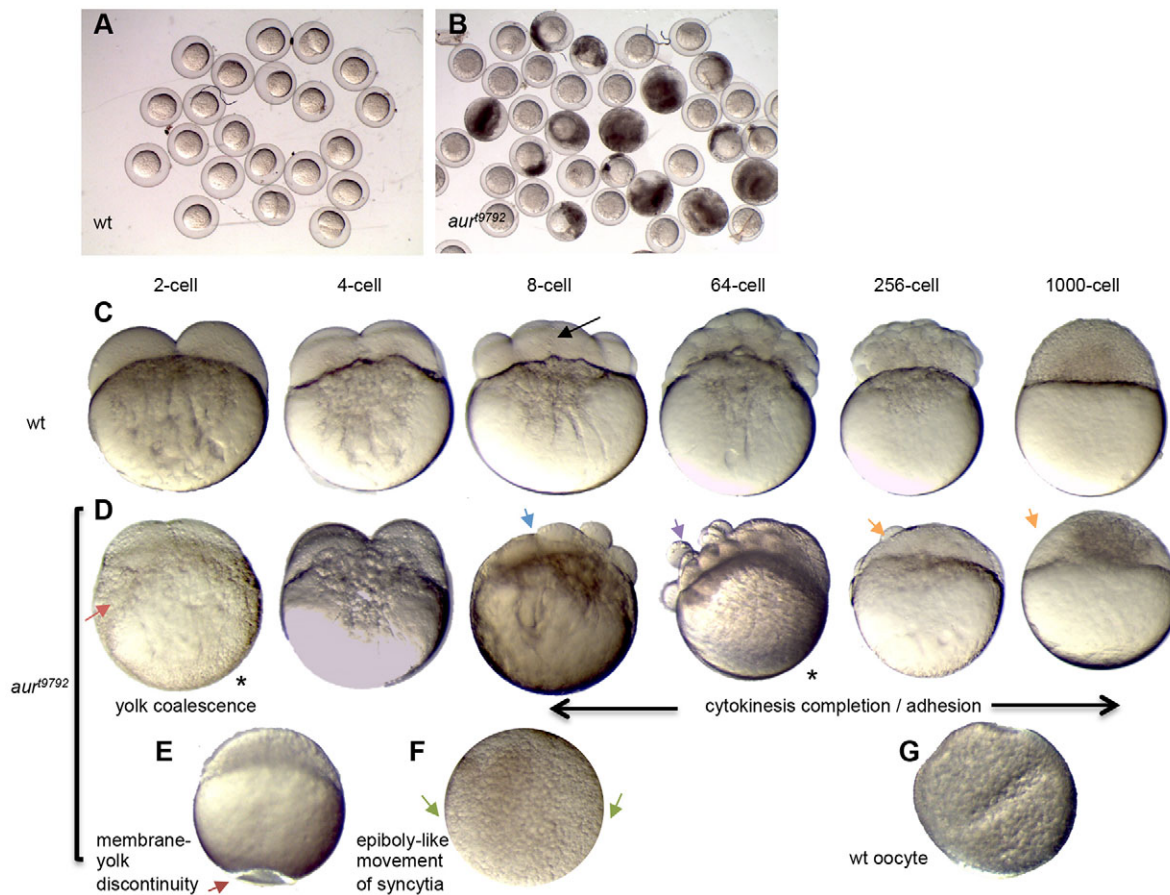

**Fig. 1. Developmental timecourse of zebrafish *aura* mutant embryos.** (A,B) Embryo clutches from wild-type (A) and *aura* mutant (B) mothers at 10 mpf showing egg lysis in mutants. (C–G) Wild-type (C,G) and *aura* mutant (D–F) timecourse. *aura* embryos do not display normal yolk coalescence (red arrow), instead resembling inactive wild-type mature oocytes (G). At the 8-cell stage, a septum is apparent in wild type (black arrow), whereas *aura* mutants lack this septum (blue arrow). *aura* mutants subsequently exhibit rounded, non-adhesive cells (purple arrow). In the cleavage stages, *aura* mutant embryos are partially or fully syncytial (orange arrows). Other phenotypes include discontinuities between the egg plasma membrane and the yolk along any animal-vegetal position (E, dark red arrow). Syncytia in *aura* mutants undergo an epiboly-like movement (F, green arrows indicate migrating edge).

wild type, the syncytial mass in *aura* mutants expands downward over the yolk (Fig. 1F, Fig. S3I–L), and mutants typically undergo lysis by 4–10 h post fertilization (hpf).

### Maternal *aura* function is essential for furrow maturation during late cytokinesis

During development of the first furrow, F-actin is recruited to form the contractile ring (Fig. 2A,A', arrow). In addition, wild-type zebrafish embryos show accumulation of pericleavage F-actin along the furrow (Fig. 2A,A', arrowheads). As the furrow matures, pericleavage F-actin forms lamella-like structures that converge at the furrow center to form an adhesive cell wall (Fig. 2C,C'). This process is repeated in subsequent cell cycles (Fig. 2E,E'). In *aura* mutants during furrow initiation (Fig. 2B,B'), F-actin accumulations occur in the contractile ring (arrow) and pericleavage (arrowheads) regions, although the level of F-actin in pericleavage regions appears reduced (Fig. 2B,B'). During furrow maturation in mutants, pericleavage F-actin does not converge or form an adhesive wall (Fig. 2D,D'), and lack of blastomere coherence becomes apparent by the third cell cycle (Fig. 2F,F', Fig. S3H).

To better visualize cell adhesion junctions, we labeled wild-type and *aura* mutant embryos to detect  $\beta$ -Catenin (Fig. 3). The same embryos were additionally labeled to detect microtubules, which have a role in the exocytosis of vesicles containing cell adhesion junction components (Jesuthasan, 1998). In wild-type embryos,  $\beta$ -Catenin aggregates along the cleavage plane in mature furrows

(Fig. 3C–E, arrows). By contrast,  $\beta$ -Catenin accumulation is severely reduced in *aura* mutant embryos (Fig. 3H–J, arrows). Surprisingly, in *aura* mutant embryos  $\beta$ -Catenin localizes to ectopic vesicles present throughout the blastocyst (Fig. 3F'–J', asterisks; see below).

The labeled embryos also allowed us to detect potential defects in microtubule reorganization during cytokinesis. During furrow initiation, wild-type embryos organize the FMA as arrays of microtubules parallel to each other and perpendicular to the furrow (Danilchik et al., 1998; Jesuthasan, 1998; Pelegri et al., 1999; Urven et al., 2006) (Fig. 3A–D, bracket in C,C'; Fig. S4A, double arrows). As furrows mature, microtubules in these arrays progressively accumulate at the furrow distal ends and tilt their orientation to form V-shape structures pointing distally (Fig. 3E,E', bracket; Fig. S4A, arrows). Subsequently, FMA tubules disassemble (Fig. S4A, arrowheads). In *aura* mutants, FMA microtubules appear to align relatively normally as arrays perpendicular to the furrow (Fig. 3F–I, brackets in H,H'; Fig. S4B, double arrows). However, during furrow maturation, FMA tubules in *aura* mutants maintain their original conformation perpendicular to the furrow and without any apparent bulk distal enrichment (Fig. 3J,J', brackets; Fig. S4B, double arrows), until they eventually become undetectable (Fig. S4B, dashed double arrows). Although microtubule alignment can appear distorted in furrow regions that contain ectopic vesicles (Fig. 3F–I), defects in FMA reorganization can be detected regardless of the presence of ectopic vesicles (Fig. S4C,D). These observations suggest that *aura* is required for FMA reorganization.

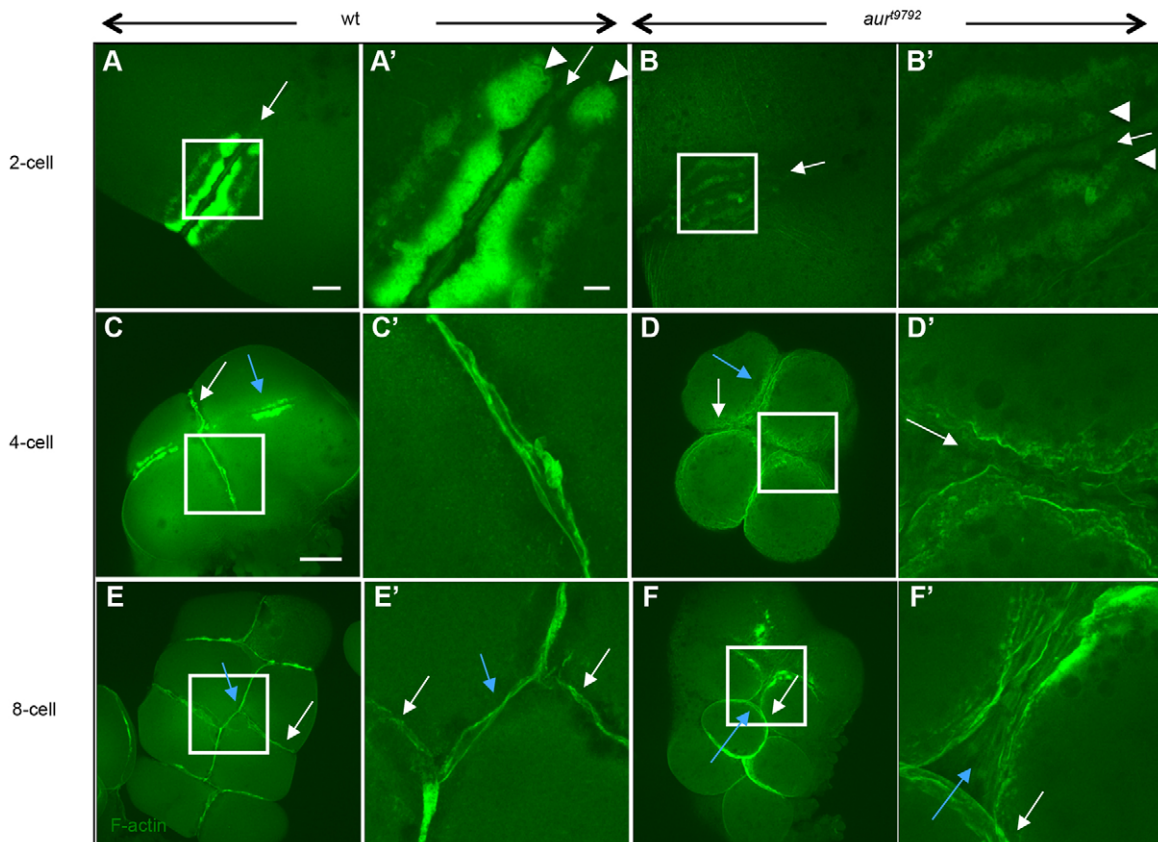

**Fig. 2. *aura* mutant embryos exhibit reduced accumulation of pericleavage and adhesive junction F-actin.** (A,A') In wild type (25/25), F-actin becomes recruited to the contractile ring (arrows) and pericleavage regions (arrowheads). (B,B') In *aura* mutants, the contractile ring pericleavage F-actin is reduced (30/30). (C,C') At the 4-cell stage, the furrow corresponding to the first cell cycle has formed adhesion junctions containing F-actin (white arrow). (D,D') At the same stage, *aura* embryos do not exhibit adhesion junction F-actin cables (white arrow). (E–F') Defects continue to be observed in subsequent furrows. White and blue arrows indicate furrows for the first and second cell cycles, respectively. (A'–F') Higher magnification views of boxed regions in A–F. Scale bars: 20  $\mu$ m in A,B; 100  $\mu$ m in C–F; 10  $\mu$ m in A'–F'.



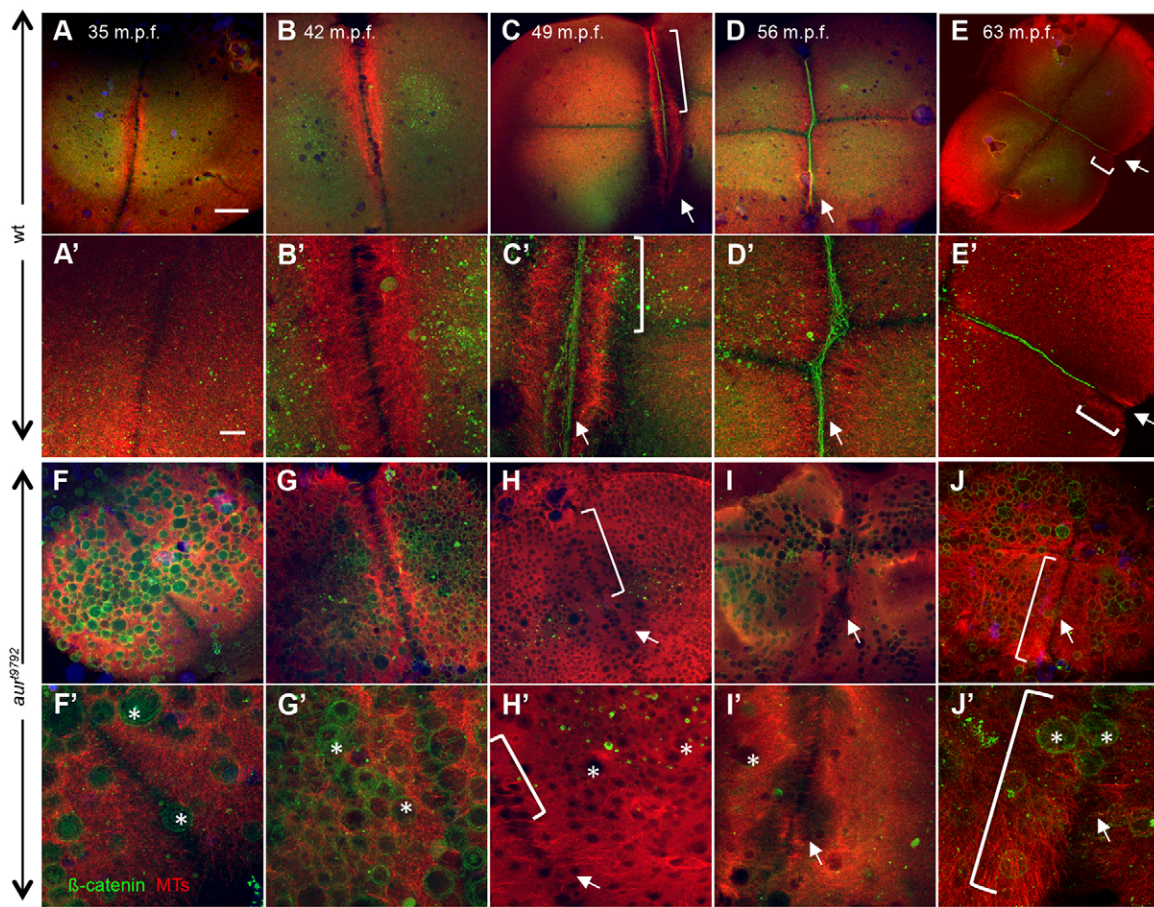

**Fig. 3. *aura* mutant embryos do not recruit cell adhesion components to furrows and exhibit aberrant furrow microtubule dynamics.** (A-E) In wild-type (12/12), the FMA forms as tubules become arranged in a parallel fashion (A-B'). As the furrow matures, FMA tubules become tilted and accumulate at the furrow distal end (E,E'). During furrow maturation, cell adhesion components such as  $\beta$ -Catenin accumulate at the furrow (C-E). (F-J) In *aura* mutants, FMA tubules form (F-H, brackets in H,H') but remain in a parallel array arrangement throughout the length of the furrow (J,J', brackets), failing to aggregate at the furrow distal ends (assayed at 49–63 mpf; 15/15). All *aura* mutant embryos examined also fail to recruit  $\beta$ -Catenin to the furrow (H-J, arrows). Instead,  $\beta$ -Catenin localizes to ectopic CGs (F'-J', asterisks). (A'-J') Higher magnification views of A-J. Scale bars: 100  $\mu$ m in A-J; 10  $\mu$ m in A'-J'.

### ***aura* mutant embryos show defects in CG exocytosis**

The size and the large number of vesicles observed in *aura* mutants suggested that they are unreleased CGs (Becker and Hart, 1999), which we confirmed using the glycoconjugate-binding dyes *Maclura pomifera* agglutinin (MPA) and wheat germ agglutinin (WGA) (Becker and Hart, 1999; El-Mestrah and Kan, 2001; Bembenek et al., 2007). Quantification of CG densities in mature, extruded eggs from wild-type and *aura* mutant females indicates that initial CG densities are not significantly different (paired *t*-test,  $P=0.56$ ). At 2 min post fertilization (mpf) (Becker and Hart, 1999), wild type and *aura* mutants still exhibit a similar density of CGs (Fig. 4A,B). In wild type, exocytosis of CGs leads to the complete or near complete absence of CGs by 10 mpf (Fig. 4C, 2.0% unreleased; see Materials and Methods). By contrast, at 10 mpf *aura* mutant embryos exhibit a significant number of unreleased CGs (Fig. 4D, 53% unreleased), which are observed in the most cortical 12  $\mu$ m and with highest densities in the region immediately below the cortex (Fig. S5A-D; data not shown). These observations suggest that CGs accumulate normally in developing *aura* mutant oocytes but experience defective release upon egg activation. A reduction in CG exocytosis can also explain defects observed in chorion expansion and integrity (Fig. S2C-E) (Wessel and Wong, 2009).

Previous studies have shown that, during oogenesis, CGs are embedded in an F-actin network and that CG release is dependent on F-actin dynamics (Becker and Hart, 1999). At 2 mpf, CGs appear similarly embedded in an F-actin network in both wild type and *aura* mutants (Fig. 4A,B, Fig. S5A,C). At 10 mpf, F-actin in wild type has undergone a dramatic rearrangement (Fig. 4C',C'', Fig. S5B) and appears enriched in cortical puncta that are likely to correspond to remnants of exocytic events (Becker and Hart, 1999) (Fig. 4C',C''). By contrast, unreleased CGs in *aura* mutants at 10 mpf appear encased in an F-actin network similar to that at earlier time points (Fig. 4D-D'', Fig. S5D). Our observations suggest that *aura* function is required for the dynamic F-actin reorganization necessary for CG release.

### ***aura* mutant embryos display defects in wound repair**

The high frequency of lysed eggs found in severely affected *aura* mutants suggested that they might have a defect in wound repair. To test this, wild-type and *aura* mutant embryos were wounded by pricking the cell membrane with an injection needle at 10–15 mpf. At 30 mpf, nearly all pricked wild-type embryos had fully resealed their cell membranes (2% with wounds,  $n=150$ ; Fig. 5A,B), whereas nearly all pricked *aura* mutant embryos continued to display signs of wounding (94%,  $n=243$ ; Fig. 5D,E).



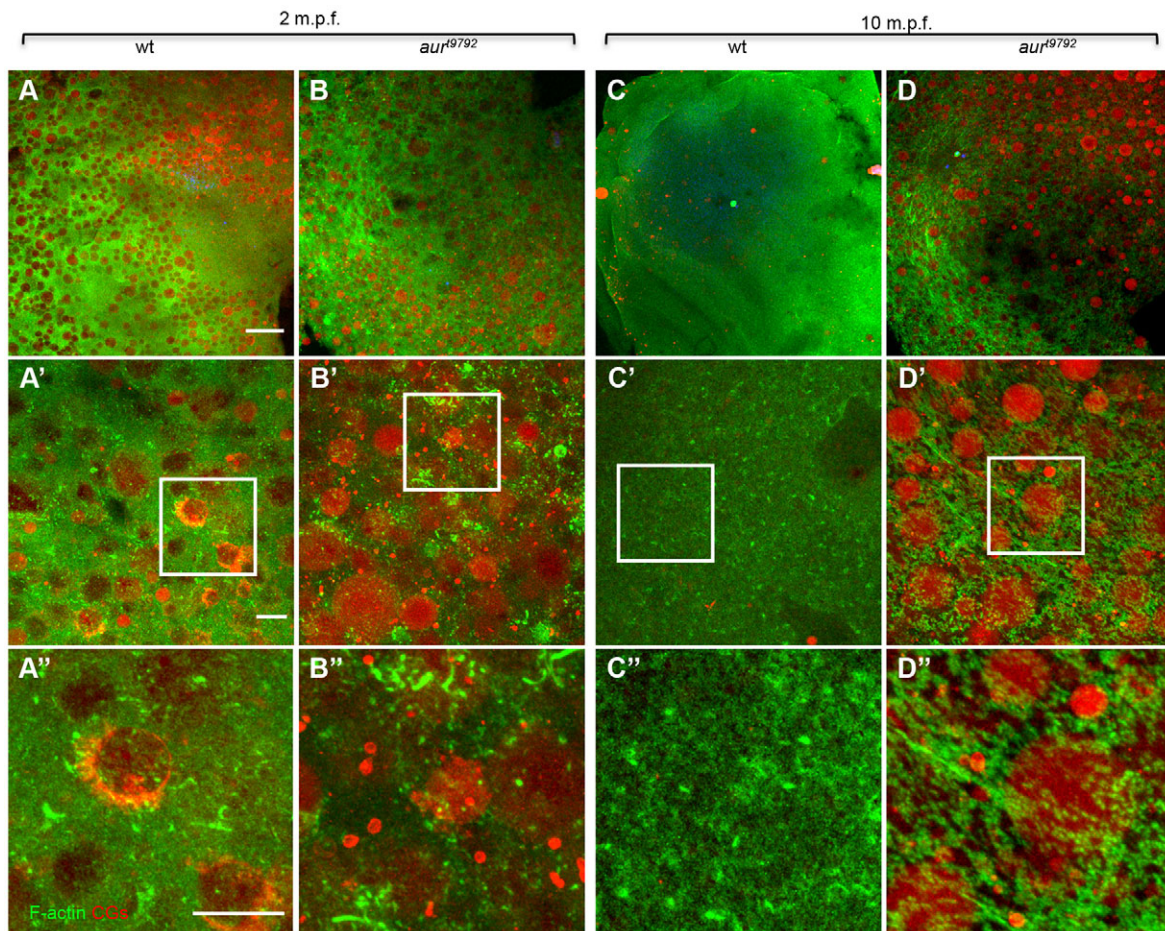

**Fig. 4. *aura* mutants retain CGs.** (A,B) During egg activation (2 mpf), CGs appear embedded in an F-actin network in both wild type (A) and *aura* mutants (B). (C,D) By 10 mpf, wild-type eggs have extruded nearly all CGs (C), whereas a large fraction of CGs are retained in *aura* mutants (D) (wild type, 0 mpf  $n=152$ , 10 mpf  $n=3$ ; mutant, 0 mpf  $n=245$ , 10 mpf  $n=130$ ; chi-square,  $P<0.0001$ ). By 10 mpf, the cortical F-actin cytoskeleton appears as a network of short F-actin fibers in *aura* mutants (D''), in contrast to being largely disassembled as in wild type (C''). (A'-D') Higher magnification views of A-D; the boxed regions are further magnified in A''-D''. Scale bars: 100  $\mu\text{m}$  in A-D; 10  $\mu\text{m}$  in A'-D', A''-D''.

Previous studies have shown that wound healing of the embryo cell membrane is mediated by the recruitment and contraction of F-actin to the edge of the wound site (Bement et al., 1999; Mandato and Bement, 2001). We therefore fixed embryos 1 min after wounding and labeled them to detect F-actin. At this time point, wild-type embryos showed small diameter rings with high levels of F-actin at the wound edge (Fig. 5C). By contrast, similarly treated *aura* mutant embryos exhibited large diameter cortical openings with reduced levels of F-actin (Fig. 5F). These observations indicate that *aura* function is required for F-actin enrichment at sites of wound repair.

#### Distribution of exocytic and endocytic markers is affected in *aura* mutants

Dynamic membrane release and retrieval, two processes affected in *aura* mutant embryos, are known to be important in CG release (Bement et al., 2000), furrow maturation (Albertson et al., 2005, 2008; Li et al., 2006, 2008; Takahashi et al., 2012) and wound closure (McNeil, 2002; Togo and Steinhardt, 2004; Idone et al., 2008). This led us to characterize the distribution of exocytic and endocytic markers in *aura* mutants. Rab11, a GTPase involved in the docking and fusion of vesicles during exocytosis (Takahashi et al., 2012) required for cytokinesis completion (Pelissier et al., 2003; Giansanti et al., 2007), accumulates at the tips of bundling

FMA tubules in wild-type embryos (Fig. 6A,A'), and this accumulation is normal in *aura* mutants (Fig. 6B,B'). By contrast, the localization of Vamp2, a marker for docking and/or fusion of membrane vesicles (Conner et al., 1997; Li et al., 2006), is severely affected in *aura* mutants. In wild-type embryos, Vamp2 accumulates along the plane of the mature furrow (Li et al., 2006) (Fig. 6C,C', Fig. S5E,E'). In *aura* mutants, Vamp2 instead localizes to the surface of ectopic vesicles corresponding to unreleased CGs (Fig. 6D,D', Fig. S5F,F'). Thus, some but not all steps in vesicle exocytosis are dependent on *aura* function.

We also analyzed the localization of two endocytic factors: Clathrin, which forms the lattice structure of endocytic coated-vesicles (Pearse, 1976; Royle, 2006); and Dynamin, a large GTPase that mediates their scission (Hinshaw, 2000). In wild type, these factors are diffusely distributed through the cortex (Fig. 6E,G), whereas in *aura* mutants Clathrin and Dynamin, like Vamp2, exhibit localization to ectopic CGs throughout the embryo (Fig. 6F,H). In the case of Clathrin, the labeling is relatively diffuse throughout the surface of the CG. Dynamin exhibits diffuse localization (Fig. S5M,N) but is also observed to form ring-like structures (Fig. 6H,H') reminiscent of Dynamin-based rings described in other systems (Hinshaw, 2000). These data are consistent with previous studies that identify Clathrin and Dynamin as components of CGs in oocytes (Faire and Bonder, 1993; Tsai et al., 2011) (Fig. S5G,H).

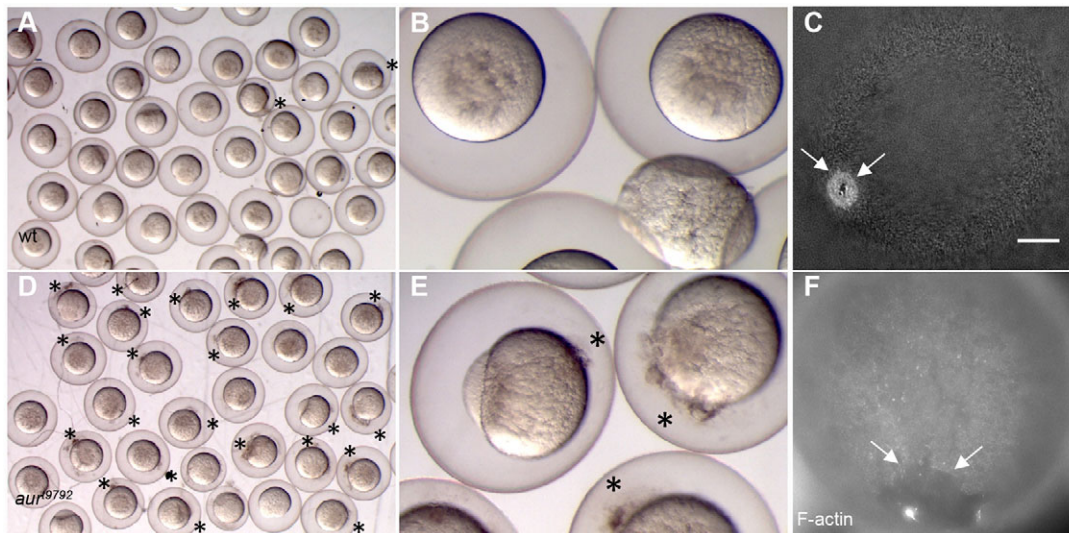

**Fig. 5. Wound healing defect in *aura* mutant embryos.** (A,B,D,E) Embryos from wild-type (A,B) and *aura* mutant (D,E) mothers were pricked with a glass injection needle at 10–15 mpf and allowed to recover until 30 mpf. After recovery, most wild-type embryos have resealed their membrane, whereas a majority of *aura* mutant embryos show continued leakage of yolk and ooplasm (D,E, asterisks). (C,F) Wild-type (C) and *aura* mutant (F) embryos were fixed 1 min after wounding and labeled with phalloidin. Wild-type embryos recruit F-actin to the closing wound edge (C, arrows; 7/7). All *aura* embryos examined show reduced F-actin enrichment at the wound edge and a larger wound diameter (F, arrows; 13/13). Scale bar: 100  $\mu$ m in C,F.

Our results suggest that the defect in CG exocytosis that occurs during egg activation in *aura* mutants results in the sequestering of exocytic and endocytic factors.

#### F-actin reorganization defects in *aura* mutants

To gain a better understanding of *aura* function we focused on cortical F-actin reorganization during the first cell cycle (Fig. 7), as this process is amenable to observation and drug treatment and occurs prior to furrow formation, facilitating interpretation of the phenotype. High-magnification views of F-actin in wild-type embryos during the period 5–35 mpf show that cortical F-actin transitions from an initial field of punctate structures at 5 mpf (Fig. 7A,A'), through transient association as aggregates at 10–20 mpf (Fig. 7B,B',C,C'), to develop band-like structures consisting of F-actin aggregates (27–35 mpf; Fig. 7D,E,E', arrows). These F-actin bands correspond to previously described circumferential F-actin arcs parallel to the outer rim of the blastodisc (Theusch et al., 2006; Nair et al., 2013b). At later stages (42–63 mpf), which coincide with the period of cytokinesis for the first cell cycle, the circumferential F-actin bands persist and a contractile band develops at the site of furrow formation (Fig. 2; data not shown). In *aura* mutants, the early cortical F-actin field appears punctate, as in wild type (Fig. 7F,F'). However, instead of undergoing the reorganization observed in wild type, in mutants the cortical F-actin develops into a fine meshwork (Fig. 7G,G',H,H'). This meshwork gradually hollows, forming an increasing area of F-actin-free patches while the F-actin coalesces into lines of single aggregates (Fig. 7J', arrowheads). Although F-actin bands can also be observed in *aura* mutants, these exhibit a less ordered orientation with respect to the blastodisc periphery and appear to be less continuous and composed of a smaller number of aggregates than in wild type (Fig. 7I, arrows). These trends continue at later stages (data not shown).

We also observed cortical F-actin in live wild type and mutants using the LifeAct transgene (Behrndt et al., 2012). This analysis revealed a dynamic wave-like pattern of cortical F-actin in wild type, which temporarily coalesces into F-actin bands (Movie 1).

*aura* mutants failed to show this dynamic pattern, instead exhibiting the gradual aggregation detected in fixed embryos (Movie 2).

We additionally tested the effect of cytoskeletal dynamics inhibitors on the F-actin network of wild-type and mutant embryos (Fig. 8), in particular whether these drugs modify the phenotype normally observed in an untreated mutant (Fig. 8F,F'). Exposure to the F-actin polymerization inhibitor cytochalasin D dramatically enhanced the *aura* cortical F-actin phenotype (Fig. 8G,G'). By contrast, exposure to the F-actin stabilizer phalloidin appeared to ameliorate the mutant F-actin phenotype (Fig. 8H,H', arrows). Exposure to microtubule inhibiting (nocodazole) and stabilizing (taxol) drugs did not have major effects on the mutant F-actin phenotype (Fig. 8I,I',J,J').

Together, our observations are consistent with a role for *aura* in the dynamic rearrangement of cortical F-actin, possibly by promoting enhanced actin polymerization or stabilization.

#### *aura* encodes Mid1 interacting protein 1 like

We undertook a positional cloning approach to identify *aura* through bulk segregation analysis, using markers polymorphic between the AB/Tübingen strain that carries the *aur*<sup>9792</sup> mutation and the WIK strain, followed by fine mapping (see Materials and Methods). Analysis of key recombination events placed the mutation within a critical region containing nine predicted genes and identified a polymorphic marker fully linked to the mutation in 700 meioses (Fig. S6A). Sequencing of amplified genomic and cDNA products for genes closest to this marker identified an A-to-T transversion in the gene *mid1 interacting protein 1 like* (*mid1ip1*). This sequence change converts a codon encoding lysine to a stop codon, causing truncation of the 24 C-terminal amino acids of Mid1ip1 (Fig. 9A,B). The C-terminal region truncated in the mutant *aura* allele deletes over half of a 45 amino acid block that is highly conserved in Mid1ip1 homologs found in various organisms, including human, mouse, frog and chicken (Fig. 9C). Protein prediction analysis (PredictProtein) suggests that this mutation occurs within the last helical structure of Mid1ip1, and mutation-



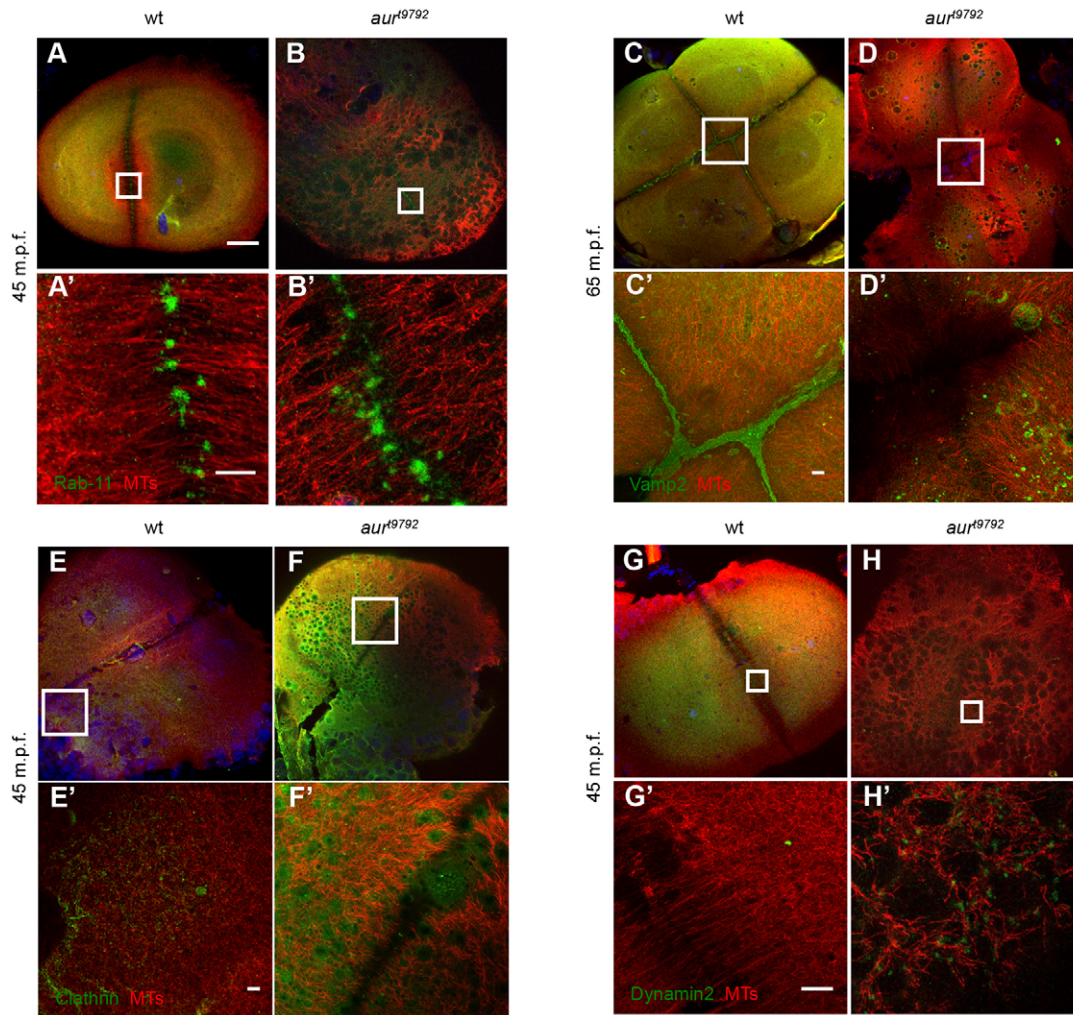

**Fig. 6. Distribution of exocytic and endocytic factors in *aura* mutants.** (A,B) The exocytic factor Rab11 properly localizes to the tips of microtubules at the furrow in wild-type (5/5) and *aura* mutant (6/6) embryos. (C,D) The exocytic factor Vamp2 localizes to mature furrows in wild type (5/5) but not in mutants (7/7). (E-H) The endocytic factors Clathrin and Dynamin 2 become enriched in ectopic CGs in *aura* mutants (F,F',H,H'), whereas they exhibit a disperse cortical distribution in wild type (E,E',G,G'). Clathrin appears localized to the CG surface in ectopic CGs in *aura* mutants (5/5 embryos, compared with 10/10 wild-type embryos with diffuse cortical labeling). Dynamin 2 also localizes to ectopic CGs (15/15 embryos, compared with 13/13 wild-type embryos with diffuse cortical labeling), which can appear as ring-like structures (3/15 embryos as shown in H') or throughout the granule surface (12/15 embryos as shown in Fig. S5M,M'). Ectopic localization to CGs was confirmed by colabeling with WGA (not shown). (A'-H') Higher magnifications of boxed regions in A-H. Scale bars: 100  $\mu$ m in A-H; 10  $\mu$ m in A'-H'.

effect predictions (SuSPect) suggest that its truncation would have severe effects on protein function (Fig. S6B).

Attempts to prove gene identity through functional manipulation of *in vitro* maturing oocytes (Nair et al., 2013a) or early embryos failed to yield conclusive results (data not shown). We therefore induced mutations in *midlip11* through CRISPR-mediated gene targeting and tested a newly induced allele for complementation against the existing maternal-effect *aura* (*aur*<sup>9792</sup>) mutation. The mutant was made by targeting *midlip11* in an N-terminal region of the Midlip11 protein (see Materials and Methods). The resulting CRISPR-generated allele, *midlip11*<sup>uw39</sup>, has a 2 bp insertion after 116 bp of the coding region, which results in normal protein sequence until amino acid 39, followed by out-of-frame sequence until amino acid 90 and translational termination (Fig. 9A, Fig. S6C). Females transheterozygous for this *midlip11*<sup>uw39</sup> allele and the maternal-effect mutation *aur*<sup>9792</sup> were generated through natural crosses and, like *aura* homozygotes, were viable and capable of producing embryos. These embryos exhibited a 100% penetrant maternal-effect phenotype essentially identical to that of *aura*

mutant embryos (Fig. 9D-G), indicating that these mutations are allelic. Similar maternal-effect phenotypes were observed in embryos from females homozygous for the *midlip11*<sup>uw39</sup> allele (Fig. S1; data not shown). We do not observe any zygotic phenotype associated with the *midlip11*<sup>uw39</sup> mutation. Altogether, our experiments demonstrate that *aura* is *midlip11*.

#### Expression of *aura* (*midlip11*) indicates a predominant role in the early embryo

RT-PCR analysis suggests that *midlip11* is present at high levels as maternal RNA early in development (up to 3.7 hpf), with progressively reduced expression at later developmental stages (Fig. 10A,N). Whole-mount *in situ* hybridization to detect *midlip11* in wild-type embryos corroborated the RT-PCR results, with uniformly distributed *midlip11* RNA present at high levels during early development (2-cell to 256-cell stage, Fig. 10B,E,F) and thereafter experiencing a severe reduction (Fig. 10G,N; data not shown). The levels and distribution of maternal *midlip11* RNA during the early stages appear similar in *aur*<sup>9792</sup> mutant embryos



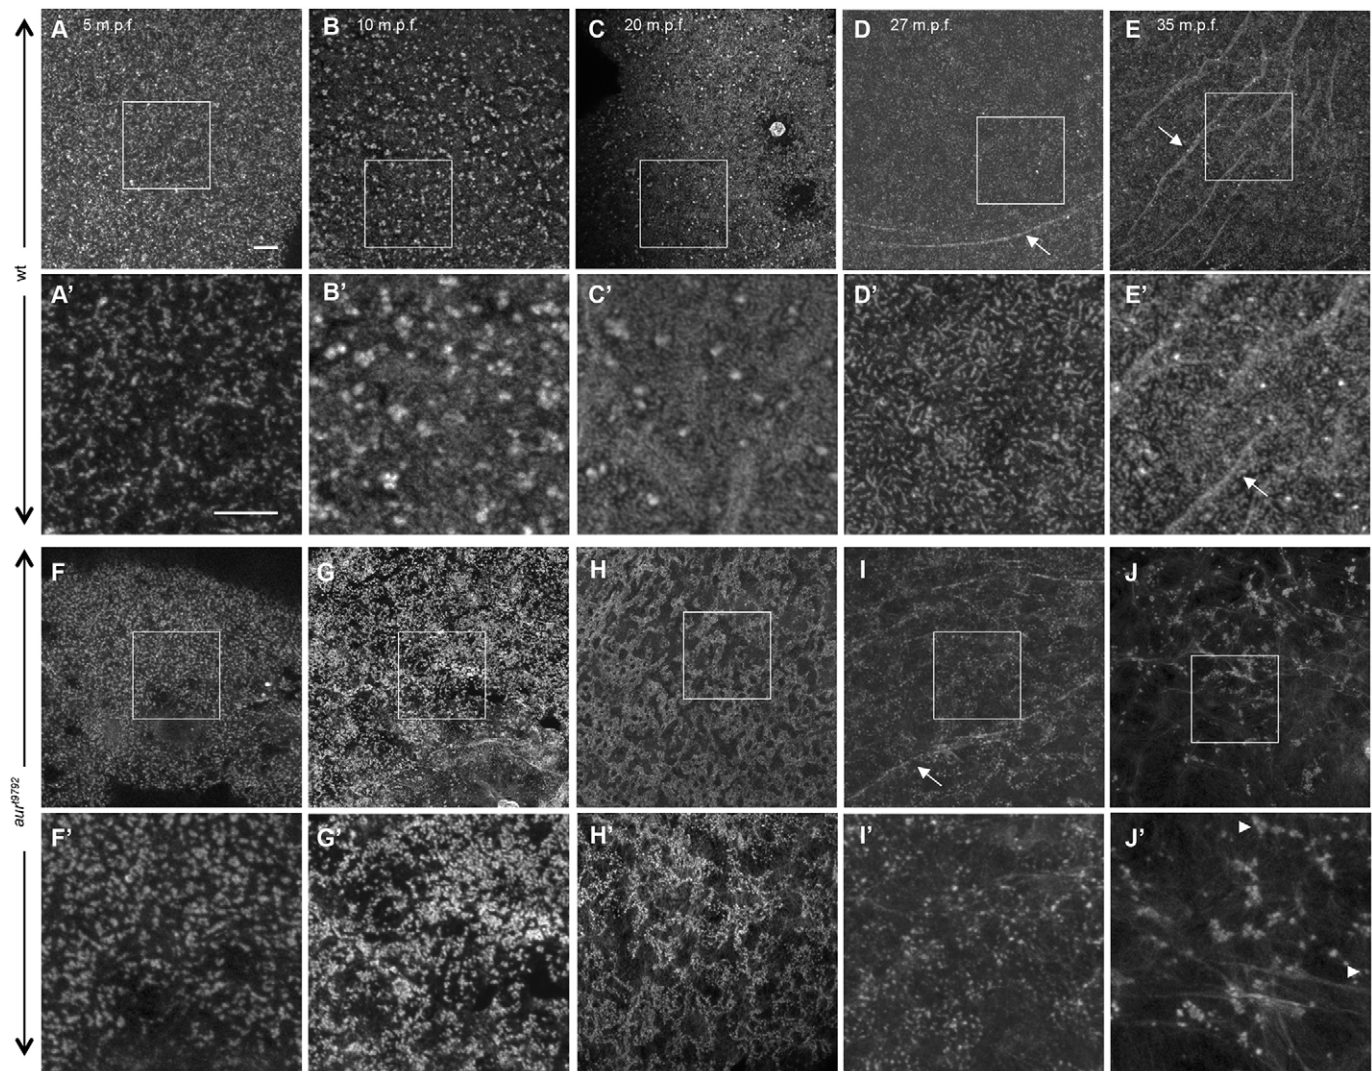

**Fig. 7. *aura* mutant embryos do not undergo dynamic actin rearrangement.** (A–E) Wild-type embryos undergo dramatic actin rearrangement at the cortex leading to organized actin arcs (arrows), whereas *aura* mutant embryos fail in cortical actin rearrangement resulting in punctate F-actin aggregation (F–J, arrowheads). (A'–J') Higher magnifications of boxed regions in A–J. At least three embryos were imaged per time point. Scale bars: 10  $\mu$ m.

(Fig. 10D). Previous studies have shown that zygotic *midlip1l* transcription is initiated in the pharyngula (24 h) stage embryo, with specific expression in hatching gland precursor (polster) cells (Thisse et al., 2001).

To detect Midlip1l expression and localization, we generated antibodies against regions of the protein (see Materials and Methods). Western analysis with antibodies against Midlip1l shows that they recognize a single band of the expected size in wild-type but not mutant embryos (Fig. S6D). Immunolabeling of fixed wild-type embryos shows that Midlip1l protein is distributed within the cortical F-actin network (Fig. 10H,K), at the developing furrows (Fig. 10L) and at induced wounds (Fig. 10M). As expected, labeling is reduced and undetectable, respectively, in mutants for the *aur*<sup>9792</sup> and *midlip1l*<sup>aw39</sup> alleles (Fig. 10I,J). High-magnification imaging of cortical F-actin reveals punctate Midlip1l within F-actin aggregates (Fig. 10K).

There are two other *midlip1l*-related genes in zebrafish: *midlip1a* and *midlip1b*. RT-PCR analysis shows that these genes produce maternal transcripts at levels lower than *midlip1l* (Fig. 10N). Both *midlip1a* and *midlip1b* become zygotically

active during embryonic development: *midlip1a* exhibits a burst of activity at the initiation of epiboly (4.5 hpf, Fig. 10N) (Kassahn et al., 2009) and *midlip1b* begins expression at the bud stage (10 hpf, Fig. 10N; data not shown). Bioinformatic searches of available databases indicate that vertebrates, including humans, mouse, *Xenopus tropicalis* and chicken, contain a single *midlip1* gene, whereas teleost fish contain three *midlip1*-related copies: *midlip1(a)*, *midlip1b* and *midlip1l*. Phylogenetic analysis is consistent with the Midlip1b form in fish lineages retaining closer relatedness to tetrapod Midlip1, with functional diversification of the Midlip1l and Midlip1a forms in fish lineages (Fig. 10O, Fig. S6E).

## DISCUSSION

Here, we show that the zebrafish gene *aura*, previously identified as a maternal-effect lethal mutation, corresponds to the *midl* interacting protein 1 family gene *midlip1l*. Our analysis shows that *aura* mutant embryos exhibit a variety of defects at the egg-to-embryo transition, including CG release, cortical integrity, cytokinesis completion and wound repair, and suggests defective



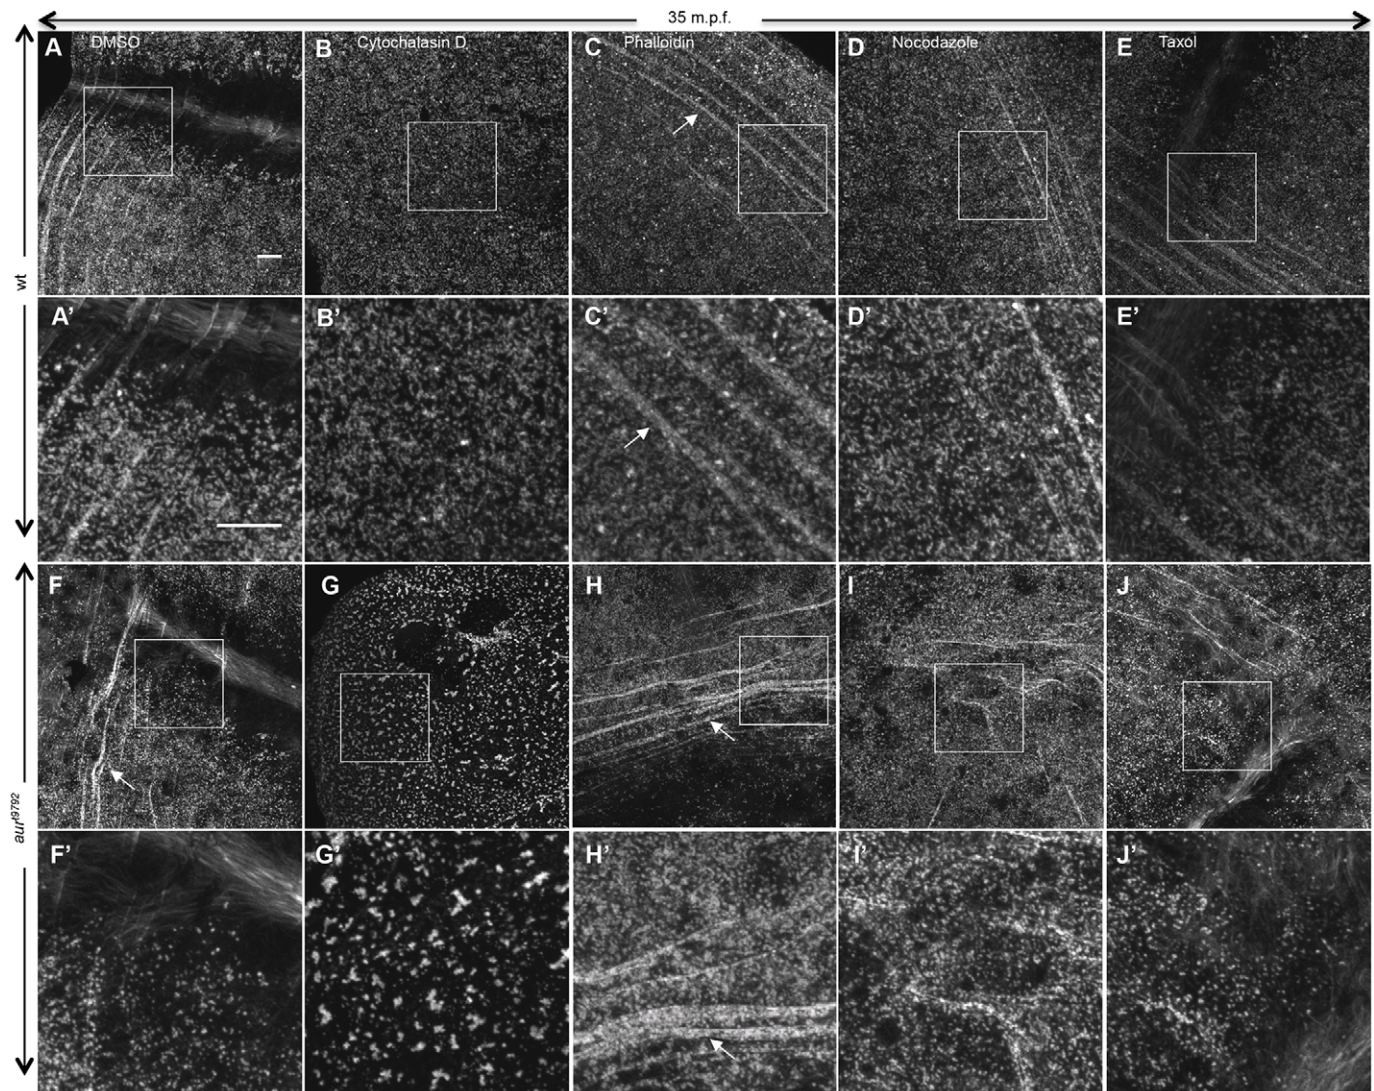

**Fig. 8. The *aura* mutant phenotype is enhanced by actin polymerization inhibitor and ameliorated by actin stabilizer.** In wild type, cytochalasin D leads to a lack of F-actin arcs (B,B'; 17/17) and phalloidin does not have an effect (C,C'; 23/23). In *aura* mutant embryos, cytochalasin D leads to strongly punctate F-actin (G,G'; 17/17), and phalloidin reverses the phenotype, stabilizing F-actin arcs (H,H', arrows; 11/11). Microtubule inhibiting (nocodazole, D,D',I,I') and stabilizing (taxol, E,E',J,J') drugs do not change the dynamic F-actin reorganization in wild-type (16/16 and 15/15, respectively) or *aura* mutant (15/15 and 10/10, respectively) embryos. (A'-J') Higher magnifications of boxed regions in A-J. Embryos are at 35 mpf. Scale bars: 10  $\mu$ m.

cytoskeletal reorganization as a likely underlying cause for these defects.

#### Identification of *aura* as encoding Mid1ip11 and use of Cas9/CRISPR to confirm gene identification

A positional cloning approach reveals that the maternal-effect mutation in *aura* is associated with a 24 amino acid C-terminal truncation in the gene *mid1ip11*, which in its wild-type form encodes a 164 amino acid protein. The C-terminal region deleted in the maternal-effect *aur<sup>d9792</sup>* mutation is highly conserved across *mid1ip1* genes in other species, suggesting that this mutation interferes with protein function.

Corroboration of gene identity is a challenge for maternal-effect genes, as their products typically act immediately or shortly after egg activation (Lindeman and Pelegri, 2012; Nair et al., 2013a,b). Indeed, our attempts to manipulate *Aura* function during oogenesis led to variable results. In order to fully prove that *aura* and *mid1ip11* are the same gene, we employed the CRISPR/

Cas9 system to generate an additional allele in *mid1ip11*. This CRISPR-generated mutation proved to be allelic to *aura* in a genetic complementation assay. Thus, CRISPR-mediated gene knockout allowed us to bypass underlying difficulties in gene identity confirmation.

#### *Aura* (Mid1ip1) is essential for cytoskeletal dynamics at the egg-to-embryo transition

The *mid1ip1* gene, also known as *MIG12*, was originally identified as encoding a protein interactor of Mid1 (Berti et al., 2004). Mid1 is a TRIM/RBCC protein implicated in X-linked Opitz G/BBB syndrome in humans, a genetic syndrome characterized by a variety of midline abnormalities (Quaderi et al., 1997; Gaudenz et al., 1998; Cox et al., 2000; De Falco et al., 2003; Winter et al., 2003). Mid1ip1 family proteins are known to associate with the microtubule cytoskeleton and are thought to aid Mid1 in the regulation of microtubule dynamics (Berti et al., 2004), and have also been shown to play a role in the regulation of lipogenesis (Inoue et al., 2011).



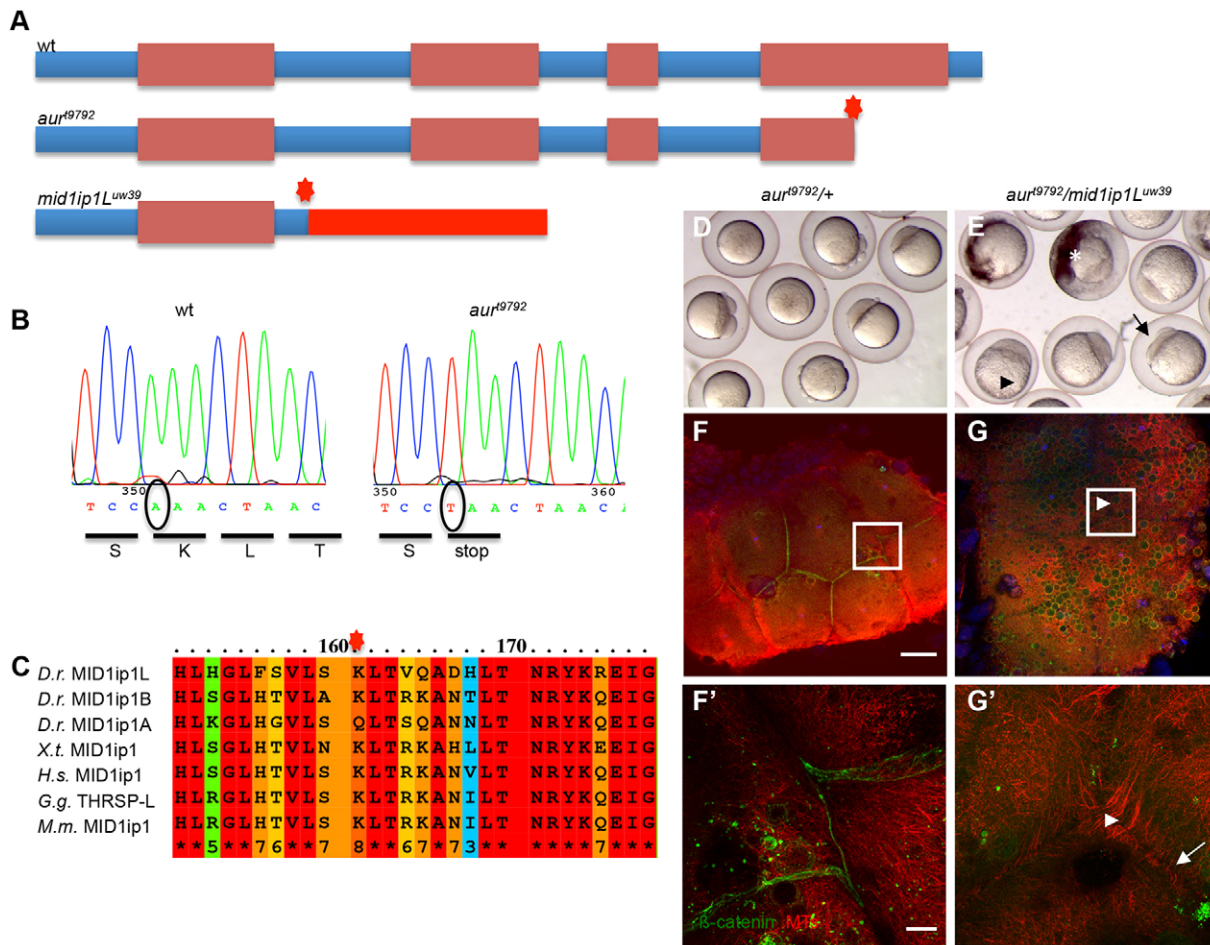

**Fig. 9. *aura* encodes Mid1ip11.** (A) Mid1ip11 protein in wild-type and *aura* mutant alleles. Red boxes indicate predicted alpha helices. The *aur*<sup>9792</sup> mutation generates a premature stop that truncates the last conserved helix. The CRISPR/Cas9-generated *mid1ip1*<sup>uw39</sup> allele results in a frameshift translated region (dark red box) followed by an early stop. (B) DNA sequencing trace of the *aur*<sup>9792</sup> allele, which creates a stop codon in amino acid 142. (C) Amino acid sequence comparison between various *mid1ip1* homologs in the *aur*<sup>9792</sup> mutation site region. The mutation in *aur*<sup>9792</sup> occurs at a highly conserved lysine. Red stars (A,C) indicate amino acid directly affected by the mutations. *D.r.*, *Danio rerio*; *X.t.*, *Xenopus tropicalis*; *H.s.*, *Homo sapiens*; *G.g.*, *Gallus gallus*; *M.m.*, *Mus Musculus*. Bottom row numbers are the Consistency Score according to the PRALINE protein alignment program. (D-G') The CRISPR/Cas9-generated *mid1ip1*<sup>uw39</sup> allele does not complement *aur*<sup>9792</sup>. (D,E) All embryos from *aur*<sup>9792</sup>/*mid1ip1*<sup>uw39</sup> transheterozygous females (E) exhibit reduced membrane integrity (asterisk), reduced yolk coalescence (arrowhead) and regressed furrows (arrow; see also Fig. S1A,B), whereas control embryos from heterozygous siblings (D) are wild type in appearance. (F,G) 8-cell embryos from transheterozygous females exhibit reduced  $\beta$ -Catenin accumulation in mature furrows (27/27; G,G', arrowheads), ectopic CGs throughout the cortex (G) and apparently stabilized FMA (G', arrow), compared with control siblings (0/25; F,F'). (F',G') Higher magnifications of boxed regions in F,G. Scale bars: 100  $\mu$ m in F,G; 10  $\mu$ m in F',G'.

Our studies show that maternally provided *aura* (*mid1ip11*) product is essential for a variety of processes at the egg-to-embryo transition, including CG release and the completion of cytokinesis (Fig. 10), as well as membrane integrity and repair. One of the processes affected in *aura* mutants is the restructuring of the FMA during furrow maturation, in agreement with the previously proposed role for Mid1ip1 in microtubule dynamics (Berti et al., 2004). Other microtubule-based processes, such as spindle formation and function, appear unaffected.

Our analysis also suggests a role for *Aura* in F-actin regulation. Previous studies have shown that CG release depends on the disassembly of the F-actin cortex during egg activation (Becker and Hart, 1999), and the CG release defect in *aura*/*mid1ip11* mutants suggests a role for *Aura* in this cytoskeletal restructuring. Similarly, *aura*/*mid1ip11* mutants show a defect in the dynamic reorganization of F-actin at the cortex prior to furrow formation and in its accumulation at the cleavage plane during furrow formation, as well as during wound repair. Accordingly, immunolabeling with

antibodies raised to Mid1ip11 protein indicate that it localizes to F-actin. Together with the effects of inhibitors of actin dynamics in these mutants, our results suggest that Mid1ip11 promotes F-actin reorganization by facilitating F-actin polymerization and/or stabilization. As in the case of the microtubule cytoskeleton, not all F-actin-based processes are strongly affected in *aura*/*mid1ip11* mutants: blastodisc cell lifting, which is known to depend on F-actin (Leung et al., 2000), is only mildly affected, and the initial contraction of the furrow, which is presumably dependent on the contractile ring, appears unaffected in these mutants.

Our findings are consistent with a previously proposed role for Mid1ip1 in the regulation of cytoskeletal dynamics and expand its targets to include the actin cytoskeleton. We cannot rule out the possibility that some of the observed effects are secondary consequences of undetected earlier developmental defects. However, imaging and inhibitor studies, including Mid1ip11 protein localization, argue for a direct role for this factor in F-actin dynamics in the early embryo. Further research will be



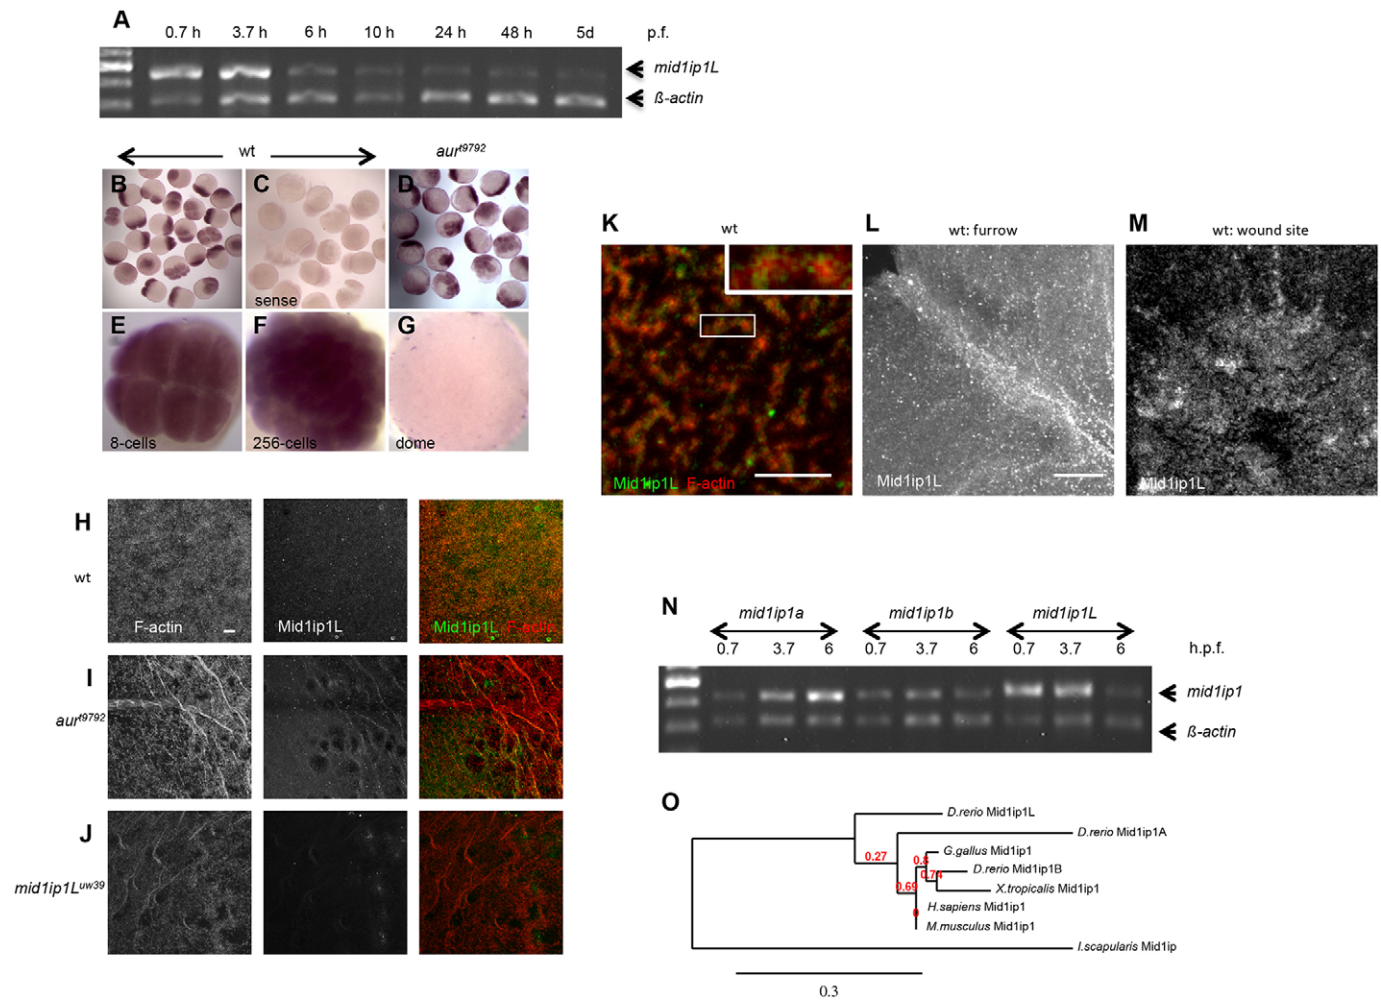

required to better understand the precise role of Aura (Mid1ip1l) in cytoskeletal regulation, as well as its potential connection to Mid1 and Optix G/BBB syndrome.

#### Sequestration of a membrane subcompartment in *aural*/*mid1ip1l* mutants

Embryonic cell division involves a marked increase in surface area, which depends on the exocytosis of internal membrane during cytokinesis. The early defect in *aural*/*mid1ip1l* mutants generates the unusual situation in which embryonic processes proceed in spite of the absence of early CG exocytosis. Instead, the membrane subcompartment corresponding to CGs is arrested in the early embryo (Fig. 11).

Previous studies have shown that, in normal embryos, CG release is tightly coupled to membrane endocytosis in order to regulate membrane surface area and reconstitute internal stores essential for membrane addition during embryonic cell division. Exocytic markers

such as Vamp2 do not accumulate at the furrow in *aura* mutants, exhibiting instead localization to unreleased CGs. This is consistent with the idea that CGs constitute an early embryonic membrane compartment that is reused at a later stage for membrane addition during cell division. By contrast, the exocytic targeting factor Rab11 exhibits normal localization at the furrow, coincident with the tip of FMA tubules. This finding suggests that Rab11 localization to the furrow occurs through transport along microtubules, consistent with previous studies (Takahashi et al., 2012), and suggests that this transport is independent of membrane compartment association.

Surprisingly, unreleased CGs in *aura* mutants also accumulate membrane proteins involved in membrane endocytosis, such as Dynamin and Clathrin (Hinshaw, 2000; Royle, 2006). In addition to its role in endocytosis, Dynamin has been shown to have a role in the regulation of fusion pore widening after exocytosis (Anantharam et al., 2011). Thus, Dynamin rings observed on unreleased CGs might represent intermediates with stalled exocytosis. Alternatively, the

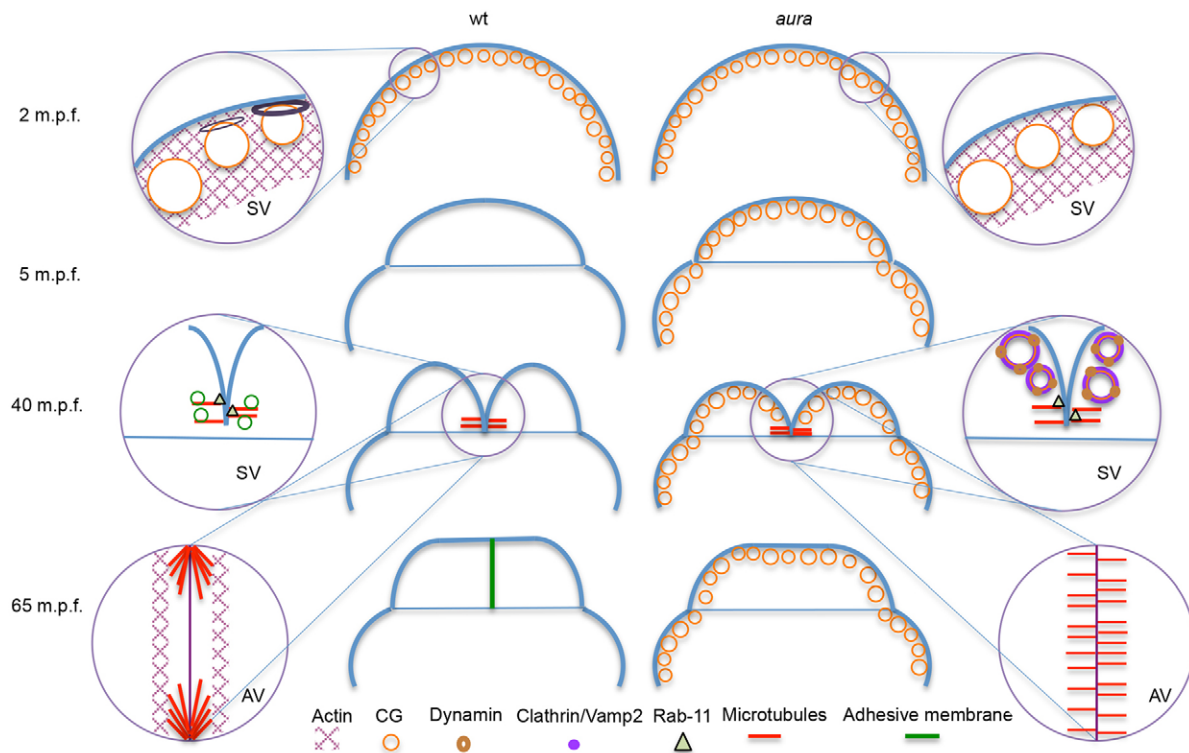

**Fig. 11. Summary of the effects on cytoskeletal and membrane dynamics observed in *aura/midlip1l* early mutant embryos.** Key processes in early wild-type embryos (left) and defects in *aura/midlip1l* mutants (right), focusing on cytoskeletal dynamics and exocytosis of internal membrane. In mutants, during egg activation CGs fail to be released, possibly owing to the inability to restructure cortical actin. During furrow formation, the microtubule-based FMA fails to reorganize and pericleavage F-actin-rich regions are reduced. Failure of pericleavage F-actin enrichment and sequestration of CG internal membrane in mutants results in the inability to form interblastomere adhesive membrane. Exocytic and endocytic components, such as Vamp2, Clathrin and Dynamin 2, become localized to unreleased CGs in mutants and are unavailable. The exocytic factor Rab11 exhibits normal furrow localization in the mutants. AV, animal view; SV, side view.

localization of these endocytic proteins to unreleased CGs might reflect that anchors for these factors pre-exist in the CG membrane compartment, in anticipation of immediate endocytosis after CG release (Hart and Collins, 1991; Bement et al., 2000). Indeed, Dynamin has been shown to act in a reinternalization mechanism involving direct membrane retrieval after exocytosis (Holroyd et al., 2002; Ryan, 2003).

The CG release defect in *aura/midlip1l* mutants results in the sequestration of a membrane subcompartment within the embryo, making it unavailable for subsequent use during cell cleavage. This sequestration is likely to contribute to the defect in late cytokinesis, which requires membrane addition (Skop et al., 2001; Strickland and Burgess, 2004; Barr and Gruneberg, 2007). The association of the cell adhesion junction component  $\beta$ -Catenin to ectopic CGs in *aura/midlip1l* mutants further suggests that CGs might be preloaded with factors used at later stages of development, such as anchors for cell adhesion junction components that may become active during cytokinesis. Wound healing is also known to depend on membrane exocytosis (McNeil, 2002) and, although CGs do not appear to participate in this process (McNeil et al., 2000), aberrant membrane recycling might also contribute to the wound healing defect observed in *aura* mutants.

#### Diversification of *midlip1* genes in the zebrafish

The zebrafish genome contains three *midlip1*-related genes. This is somewhat surprising considering the expected duplicate copies from a whole-genome duplication event that occurred early in the teleost lineage. *midlip1b*, which is most closely related in sequence to other vertebrate *midlip1* genes, is widely expressed in the

zebrafish embryo. By contrast, both *midlip1a* and *midlip1l* (*aura*) have specific patterns of expression: *midlip1a* as a temporal spike at the beginning of gastrulation and *midlip1l* largely as a maternal transcript but also zygotically expressed in hatching gland precursor cells. These expression patterns indicate functional *midlip1* gene diversification within the teleost lineage.

#### Conclusions

In summary, we have determined that a maternal-effect mutation in *aura* corresponds to a mutation in *midlip1l*, the product of which was known to associate with the Opitz G/BBB syndrome factor Mid1 and thought to contribute to microtubule dynamics. We show that zebrafish *aura* (*midlip1l*) function is required for cytoskeletal reorganization at the egg-to-embryo transition, involving not only microtubules but also F-actin. In addition, CG sequestration in *aura/midlip1l* mutants suggests multiple pathways for exocytic factors and underscores the requirement for membrane recycling in the early embryo.

#### MATERIALS AND METHODS

##### Genetic methods

Fish were maintained under standard conditions at 28.5°C (Brand et al., 2002). *aur*<sup>9792</sup> was generated in an AB/Tübingen hybrid background (Pelegrini et al., 2004). Wild-type stocks were WIK for the mapping crosses and AB for functional analysis. Wild-type embryos were tested as a mixed pool and mutant embryos were tested as separate clutches, in both cases derived from two to four females. Transgenic lines were EMTB [*Tg(EMTB-3GFP)*] (Wühr et al., 2010) and LifeAct [*Tg(actb2:LIFEACT-GFP)*] (Behrmdt et al., 2012). All animal experiments were conducted according to University of Wisconsin – Madison and Institutional Animal Care and Use



Committee (IACUC) guidelines (University of Wisconsin – Madison assurance number A3368-01).

Positional cloning was carried out as described (Pelegrini and Mullins, 2011). First-pass mapping with 214 SSLP markers distributed 10 cM apart showed linkage of *aura* to LG 14. A second phase of mapping from genotyped parents narrowed the genomic region to a 1.2 cM interval and a polymorphism from the left end of BAC CR388071.10 to 0.23 Mb (Fig. S6).

### Fluorescence imaging

Embryos were fixed with paraformaldehyde-glutaraldehyde after dechorionation (Urven et al., 2006) and oocyte labeling was carried out as previously described (Gupta et al., 2010). Primary antibodies: mouse anti- $\alpha$ -Tubulin (1:2500; Sigma, T5168), rabbit anti- $\beta$ -Catenin (1:1000; Sigma, C2206), rabbit anti-Vamp2 (1:200; Abcam, ab70222), rabbit anti-Rab11b (1:200; GeneTex, GTX127328), rabbit anti-Dynamin 2 (1:100; GeneTex, GTX127330), rabbit anti-Clathrin (1:200; Abcam, ab59710) and rabbit anti-Vamp4 (1:400; SySy, 136 002). Mouse anti-Mid1p11 (1:400; Antibodies-Online) was derived from three separate peptides in the middle of Mid1p11 and thus able to detect *aur*<sup>9792</sup> but not *mid1p11*<sup>uw39</sup>.

For CG analysis, embryos were fixed with paraformaldehyde, dechorionated, washed in PBS containing 1% Triton X-100 and labeled with Alexa-488-conjugated phalloidin (Thermo Fisher, A12379) for 1 h at room temperature and Alexa-555-conjugated WGA (Life Technologies; 1:100) for 30 min at 37°C. When colabeling with anti-Clathrin and anti-Dynamin 2, WGA was used first as it binds antibodies. Embryos were semi-flat mounted. For F-actin, the paraformaldehyde fix contained 0.2 U/ml Rhodamine-phalloidin for preservation and imaging. Immunofluorescence data are from at least duplicate trials. Quantification of the CG release phenotype was carried out by comparing the total number of CGs in 60× magnification cortical fields at 0 and 10 min post activation from the same females (*aura*, six fields per time point; wild type, four fields per time point). Epifluorescence images were captured using a Zeiss Axioplan 2. Confocal microscopy images were obtained using a Zeiss LSM 510 (for fixed images and live movies at low magnification) or Zeiss LSM 780 (for live movies at high magnification) and processed with Fiji.

### Drug treatment

Wild-type and *aur*<sup>9792</sup> embryos were dechorionated and exposed to drug treatment at 15 mpf. Concentrations of inhibitors in E3 medium: cytochalasin D, 20  $\mu$ g/ml; phalloidin, 10  $\mu$ g/ml; nocodazole, 2  $\mu$ g/ml; and taxol, 10  $\mu$ g/ml.

### Histology and *in situ* hybridization

Dissected wild-type and *aur*<sup>9792</sup> ovaries were fixed overnight in paraformaldehyde, washed in PBS and dehydrated in ethanol. Ovaries were embedded in paraffin, sectioned, stained and mounted as described previously (Gupta et al., 2010). *mid1p11* was amplified using wild-type 2-cell embryo cDNA with forward and reverse primers (Table S1), the latter including a T7 promoter. Riboprobes were synthesized using digoxigenin-labeled UTP (Sigma, 3359247910) and *in situ* hybridization was carried out as described previously (Pelegrini and Maischein, 1998). Images of labeled embryos and sectioned ovaries were acquired using a Leica FLIII microscope and Spot Insight camera (Diagnostic Instruments). Data are from at least duplicate trials.

### Functional manipulation and molecular methods

RNA was generated from the cDNA product (see above) using the T7 RNA ULTRA mMESSAGE mMACHINE Kit (Ambion) and poly(A) tailed. RNA was mixed with 0.2 M KCl and injected into oocytes (Nair et al., 2013a,b). Embryo RNA was extracted with Trizol (Thermo Fisher, 15596026) and subject to RT-PCR using gene-specific *mid1p11/a/b* and  $\beta$ -actin 1 primers (Table S1).

### Phylogenetic analysis

Phylogenetic trees, sequence alignment and phenotypic prediction were carried out using Phylogeny.fr (Dereeper et al., 2008, 2010), PRALINE (CIBVU) and SuSPect (Yates et al., 2014), respectively.

### CRISPR/Cas9

sgRNA was designed using <http://crispr.mit.edu>, PCR amplified with universal primers (Bassett et al., 2013) and *in vitro* transcribed using the T7 Flash Kit (Epicentre). Plasmid #46757 pT3TS::nCas9n (Jao et al., 2013; Moreno-Mateos et al., 2015) was digested with *Xba*I, purified and transcribed using the T3 mMESSAGE mMACHINE Kit (Ambion). Cas9 RNA and sgRNA were injected at 100 ng/ $\mu$ l and 30 ng/ $\mu$ l, respectively. Injected fish were raised and mated to wild-type fish. The next generation was raised and sequenced (C.E. and F.P., unpublished). Sequencing in transheterozygotes was carried out through a nested PCR approach.

### Acknowledgements

We thank Drs Martin Wühr and Tim Mitchison (Harvard University) and Carl-Philipp Heisenberg (IST, Austria) for transgenic lines; and Dr Gratz for CRISPR mutation consultation and Drs Moreno-Mateos and Giraldez for their unpublished CRISPR/Cas9 protocol.

### Competing interests

The authors declare no competing or financial interests.

### Author contributions

C.E. performed phenotypic, cytoskeletal, CG release, membrane factor, expression and wounding analyses, confirmed gene identification, and prepared the manuscript. B.S. performed linkage, cytoskeletal and CG release analyses. F.P. prepared the manuscript.

### Funding

This work was supported by the National Institutes of Health [GM065303 to F.P.; GM108449 to C.E.]. Deposited in PMC for release after 12 months.

### Supplementary information

Supplementary information available online at <http://dev.biologists.org/lookup/suppl/doi:10.1242/dev.130591/-/DC1>

### References

- Albertson, R., Riggs, B. and Sullivan, W. (2005). Membrane traffic: a driving force in cytokinesis. *Trends Cell Biol.* **15**, 92–101.
- Albertson, R., Cao, J., Hsieh, T.-S. and Sullivan, W. (2008). Vesicles and actin are targeted to the cleavage furrow via furrow microtubules and the central spindle. *J. Cell Biol.* **181**, 777–790.
- Anantharam, A., Bittner, M. A., Aikman, R. L., Stuenkel, E. L., Schmid, S. L., Axelrod, D. and Holz, R. W. (2011). A new role for the dynamin Gtpase in the regulation of fusion pore expansion. *Mol. Biol. Cell* **22**, 1907–1918.
- Barr, F. A. and Gruneberg, U. (2007). Cytokinesis: placing and making the final cut. *Cell* **131**, 847–860.
- Bassett, A. R., Tibbit, C., Ponting, C. P. and Liu, J.-L. (2013). Highly efficient targeted mutagenesis of Drosophila with the Crispr/Cas9 system. *Cell Rep.* **4**, 220–228.
- Becker, K. A. and Hart, N. H. (1996). The cortical actin cytoskeleton of unactivated zebrafish eggs: spatial organization and distribution of filamentous actin, nonfilamentous actin, and myosin-II. *Mol. Reprod. Dev.* **43**, 536–547.
- Becker, K. A. and Hart, N. H. (1999). Reorganization of filamentous actin and myosin-II in zebrafish eggs correlates temporally and spatially with cortical granule exocytosis. *J. Cell Sci.* **112**, 97–110.
- Behrnt, M., Salbreux, G., Campinho, P., Hauschild, R., Oswald, F., Roensch, J., Grill, S. W. and Heisenberg, C.-P. (2012). Forces driving epithelial spreading in zebrafish gastrulation. *Science* **338**, 257–260.
- Bembek, J. N., Richie, C. T., Squirrell, J. M., Campbell, J. M., Eliceiri, K. W., Poteryaev, D., Spang, A., Golden, A. and White, J. G. (2007). Cortical granule exocytosis in C. Elegans is regulated by cell cycle components including separase. *Development* **134**, 3837–3848.
- Bement, W. M., Mandato, C. A. and Kirsch, M. N. (1999). Wound-induced assembly and closure of an actomyosin purse string in Xenopus oocytes. *Curr. Biol.* **9**, 579–587.
- Bement, W. M., Benink, H., Mandato, C. A. and Swelstad, B. B. (2000). Evidence for direct membrane retrieval following cortical granule exocytosis in xenopus oocytes and eggs. *J. Exp. Zool.* **286**, 767–775.
- Berti, C., Fontanella, B., Ferrentino, F. and Meroni, G. (2004). Mig12, a novel optix syndrome gene product partner, is expressed in the embryonic ventral midline and co-operates with mid1 to bundle and stabilize microtubules. *BMC Cell Biol.* **5**, 9.
- Brand, M., Granato, M. and Nüsslein-Volhard, C. (2002). Keeping and raising zebrafish. In *Zebrafish - A Practical Approach*, Vol. 261 (ed. C. Nüsslein-Volhard and R. Dahm), pp. 7–37. Oxford: Oxford University Press.

- Conner, S., Leaf, D. and Wessel, G. (1997). Members of the snare hypothesis are associated with cortical granule exocytosis in the sea urchin egg. *Mol. Reprod. Dev.* **48**, 106-118.
- Cox, T. C., Allen, L. R., Cox, L. L., Hopwood, B., Goodwin, B., Haan, E. and Suthers, G. K. (2000). New mutations in mid1 provide support for loss of function as the cause of X-linked opitz syndrome. *Hum. Mol. Genet.* **9**, 2553-2562.
- Danilchik, M. V., Funk, W. C., Brown, E. E. and Larkin, K. (1998). Requirement for microtubules in new membrane formation during cytokinesis of *Xenopus* embryos. *Dev. Biol.* **194**, 47-60.
- Danilchik, M. V., Bedrick, S. D., Brown, E. E. and Ray, K. (2003). Furrow microtubules and localized exocytosis in cleaving *Xenopus laevis* embryos. *J. Cell Sci.* **116**, 273-283.
- De Falco, F., Cainarca, S., Andolfi, G., Ferrentino, R., Berti, C., Rodríguez Criado, G., Rittinger, O., Dennis, N., Odent, S., Rastogi, A. et al. (2003). X-linked opitz syndrome: novel mutations in the Mid1 gene and redefinition of the clinical spectrum. *Am. J. Hum. Genet.* **120A**, 222-228.
- Dereeper, A., Guignon, V., Blanc, G., Audic, S., Buffet, S., Chenevet, F., Dufayard, J. F., Guindon, S., Lefort, V., Lescot, M. et al. (2008). Phylogeny.fr: robust phylogenetic analysis for the non-specialist. *Nucleic Acids Res.* **36**, W465-W469.
- Dereeper, A., Audic, S., Claverie, J.-M. and Blanc, G. (2010). Blast-explorer helps you building datasets for phylogenetic analysis. *BMC Evol. Biol.* **10**, 8.
- Dosch, R., Wagner, D. S., Mintzer, K. A., Runke, G., Wiemelt, A. P. and Mullins, M. C. (2004). Maternal control of vertebrate development before the midblastula transition: mutants from the zebrafish I. *Dev. Cell* **6**, 771-780.
- El-Mestrah, M. and Kan, F. W. (2001). Distribution of lectin-binding glycosidic residues in the hamster follicular oocytes and their modifications in the Zona pellucida after ovulation. *Mol. Reprod. Dev.* **60**, 517-534.
- Faire, K. and Bonder, E. M. (1993). Sea urchin egg 100-kDa dynamin-related protein: identification of and localization to intracellular vesicles. *Dev. Biol.* **159**, 581-594.
- Fernández, J., Valladares, M., Fuentes, R. and Ubilla, A. (2006). Reorganization of cytoplasm in the zebrafish oocyte and egg during early steps of ooplasmic segregation. *Dev. Dyn.* **235**, 656-671.
- Fuentes, R. and Fernández, J. (2010). Ooplasmic segregation in the zebrafish zygote and early embryo: pattern of ooplasmic movements and transport pathways. *Dev. Dyn.* **239**, 2172-2189.
- Gaudenz, K., Roessler, E., Quaderi, N. A., Franco, B., Feldman, G., Gasser, D. L., Wittwer, B., Montini, E., Opitz, J. M., Ballabio, A. et al. (1998). Opitz G/Bbb syndrome in Xp22: mutations in the Mid1 gene cluster in the carboxy-terminal domain. *Am. J. Hum. Genet.* **63**, 703-710.
- Giansanti, M. G., Belloni, G. and Gatti, M. (2007). Rab11 is required for membrane trafficking and actomyosin ring constriction in meiotic cytokinesis of *Drosophila* males. *Mol. Biol. Cell* **18**, 5034-5047.
- Gupta, T., Marlow, F. L., Ferriola, D., Mackiewicz, K., Daprich, J., Monos, D. and Mullins, M. C. (2010). Microtubule actin crosslinking factor 1 regulates the balbiani body and animal-vegetal polarity of the zebrafish embryo. *PLoS Genet.* **6**, e1001073.
- Hart, N. H. and Collins, G. C. (1991). An electron-microscope and freeze-fracture study of the egg cortex of *Brachydanio rerio*. *Cell Tissue Res.* **265**, 317-328.
- Hart, N. H., Wolenski, J. S. and Donovan, M. J. (1987). Ultrastructural localization of lysosomal enzymes in the egg cortex of *brachydanio*. *J. Exp. Zool.* **244**, 17-32.
- Hinshaw, J. E. (2000). Dynamin and its role in membrane fission. *Annu. Rev. Cell Dev. Biol.* **16**, 483-519.
- Hisaoka, K. K. and Firlit, C. F. (1960). Further Studies on the embryonic development of the zebrafish, *Brachydanio rerio* (Hamilton-Buchanan). *J. Morphol.* **107**, 205-225.
- Holroyd, P., Lang, T., Wenzel, D., De Camilli, P. and Jahn, R. (2002). Imaging direct, dynamin-dependent recapture of fusing secretory granules on plasma membrane lawns from Pc12 cells. *Proc. Natl. Acad. Sci. USA* **99**, 16806-16811.
- Idone, V., Tam, C., Goss, J. W., Toomre, D., Pypaert, M. and Andrews, N. W. (2008). Repair of injured plasma membrane by rapid Ca<sup>2+</sup>-dependent endocytosis. *J. Cell Biol.* **180**, 905-914.
- Inoue, J., Yamasaki, K., Ikeuchi, E., Satoh, S.-i., Fujiwara, Y., Nishimaki-Mogami, T., Shimizu, M. and Sato, R. (2011). Identification of MIG12 as a mediator for stimulation of lipogenesis by LXR activation. *Mol. Endocrinol.* **25**, 995-1005.
- Jao, L.-E., Wente, S. R. and Chen, W. (2013). Efficient multiplex biallelic zebrafish genome editing using a Caspr nuclease system. *Proc. Natl. Acad. Sci. USA* **110**, 13904-13909.
- Jesuthasan, S. (1998). Furrow-associated microtubule arrays are required for the cohesion of zebrafish blastomeres following cytokinesis. *J. Cell Sci.* **111**, 3695-3703.
- Kanagaraj, P., Gautier-Stein, A., Riedel, D., Schomburg, C., Cerdà, J., Vollack, N. and Dosch, R. (2014). Souffle/spastizin controls secretory vesicle maturation during zebrafish oogenesis. *PLoS Genet.* **10**, e1004449.
- Kassahn, K. S., Dang, V. T., Wilkins, S. J., Perkins, A. C. and Ragan, M. A. (2009). Evolution of gene function and regulatory control after whole-genome duplication: comparative analyses in vertebrates. *Genome Res.* **19**, 1404-1418.
- Leung, C. F., Webb, S. E. and Miller, A. L. (2000). On the mechanism of ooplasmic segregation in single-cell zebrafish embryos. *Dev. Growth Differ.* **42**, 29-40.
- Li, W. M., Webb, S. E., Lee, K. W. and Miller, A. L. (2006). Recruitment and snare-mediated fusion of vesicles in furrow membrane remodeling during cytokinesis in zebrafish embryos. *Exp. Cell Res.* **312**, 3260-3275.
- Li, W. M., Webb, S. E., Chan, C. M. and Miller, A. L. (2008). Multiple roles of the furrow deepening Ca<sup>2+</sup> transient during cytokinesis in zebrafish embryos. *Dev. Biol.* **316**, 228-248.
- Lindeman, R. E. and Pegreli, F. (2012). Localized products of Futile Cycle/Lrmp promote centrosome-nucleus attachment in the zebrafish zygote. *Curr. Biol.* **22**, 843-851.
- Mandato, C. A. and Bement, W. M. (2001). Contraction and polymerization cooperate to assemble and close actomyosin rings around *Xenopus* oocyte wounds. *J. Cell Biol.* **154**, 785-798.
- Marlow, F. L. and Mullins, M. C. (2008). Bucky ball functions in Balbiani body assembly and animal-vegetal polarity in the oocyte and follicle cell layer in zebrafish. *Dev. Biol.* **321**, 40-50.
- McNeil, P. L. (2002). Repairing a torn cell surface: make way, lysosomes to the rescue. *J. Cell Sci.* **115**, 873-879.
- McNeil, P. L., Vogel, S. S., Miyake, K. and Terasaki, M. (2000). Patching plasma membrane disruptions with cytoplasmic membrane. *J. Cell Sci.* **113**, 1891-1902.
- Mei, W., Lee, K. W., Marlow, F. L., Miller, A. L. and Mullins, M. C. (2009). Hnmp1 is required to generate the Ca<sup>2+</sup> signal that causes egg activation in zebrafish. *Development* **136**, 3007-3017.
- Moreno-Mateos, M. A., Vejnar, C. E., Beaudoin, J.-D., Fernandez, J. P., Mis, E. K., Khokha, M. K. and Giraldez, A. J. (2015). Crisprscan: designing highly efficient sgRNAs for Cas9 targeting *in vivo*. *Nat. Methods* **12**, 982-988.
- Nair, S., Lindeman, R. E. and Pegreli, F. (2013a). *in vitro* oocyte culture-based manipulation of zebrafish maternal genes. *Dev. Dyn.* **242**, 44-52.
- Nair, S., Marlow, F., Abrams, E., Kapp, L., Mullins, M. and Pegreli, F. (2013b). The chromosomal passenger protein Birc5b organizes microfilaments and germ plasm in the zebrafish embryo. *PLoS Genet.* **9**, e1003448.
- Pearse, B. M. (1976). Clathrin: a unique protein associated with intracellular transfer of membrane by coated vesicles. *Proc. Natl. Acad. Sci. USA* **73**, 1255-1259.
- Pegreli, F. and Maischein, H.-M. (1998). Function of zebrafish  $\beta$ -catenin and Tcf-3 in dorsoventral patterning. *Mech. Dev.* **77**, 63-74.
- Pegreli, F. and Mullins, M. (2011). Genetic screens for mutations affecting adult traits and parental-effect genes. *Methods Cell Biol.* **104**, 83-120.
- Pegreli, F., Knaut, H., Maischein, H.-M., Schulte-Merker, S. and Nüsslein-Volhard, C. (1999). A mutation in the zebrafish maternal-effect gene Nebel affects furrow formation and Vasa RNA localization. *Curr. Biol.* **9**, 1431-1440.
- Pegreli, F., Dekens, M. P. S., Schulte-Merker, S., Maischein, H.-M., Weiler, C. and Nüsslein-Volhard, C. (2004). Identification of recessive maternal-effect mutations in the zebrafish using a gynogenesis-based method. *Dev. Dyn.* **231**, 324-335.
- Pelissier, A., Chauvin, J.-P. and Lecuit, T. (2003). Trafficking Through Rab11 endosomes is required for cellularization during *Drosophila* embryogenesis. *Curr. Biol.* **13**, 1848-1857.
- Quaderi, N. A., Schweiger, S., Gaudenz, K., Franco, B., Rugarli, E. I., Berger, W., Feldman, G., Volta, M., Andolfi, G., Gingenkrantz, S. et al. (1997). Opitz G/Bbb syndrome, a defect of midline development, is due to mutations in a new ring finger gene on Xp22. *Nat. Genet.* **17**, 285-291.
- Rappaport, R. (1996). *Cytokinesis in Animal Cells*. Cambridge: Cambridge University Press.
- Royle, S. J. (2006). The cellular functions of clathrin. *Cell. Mol. Life Sci.* **63**, 1823-1832.
- Ryan, T. A. (2003). Kiss-and-run, fuse-pinch-and-linger, fuse-and-collapse: the life and times of a neurosecretory granule. *Proc. Natl. Acad. Sci. USA* **100**, 2171-2173.
- Skop, A. R., Bergmann, D., Mohler, W. A. and White, J. G. (2001). Completion of cytokinesis in *C. elegans* requires a brefeldin A-sensitive membrane accumulation at the cleavage furrow apex. *Curr. Biol.* **11**, 735-746.
- Strickland, L. I. and Burgess, D. R. (2004). Pathways for membrane trafficking during cytokinesis. *Trends Cell Biol.* **14**, 115-118.
- Takahashi, S., Kubo, K., Waguri, S., Yabashi, A., Shin, H.-W., Katoh, Y. and Nakayama, K. (2012). Rab11 regulates exocytosis of recycling vesicles at the plasma membrane. *J. Cell Sci.* **125**, 4049-4057.
- Theusch, E. V., Brown, K. J. and Pegreli, F. (2006). Separate pathways of RNA recruitment lead to the compartmentalization of the zebrafish germ plasm. *Dev. Biol.* **292**, 129-141.
- Thisse, B., Pflumio, S., Fürthauer, M., Loppin, B., Heyer, V., Degraeve, A., Woehl, R., Lux, A., Steffan, T., Charbonnier, X. Q. et al. (2001). Expression of the zebrafish genome during embryogenesis. *Zfin Direct Data Submission*, <https://zfin.org/ZDB-PUB-010810-1>.
- Togo, T. and Steinhardt, R. A. (2004). Nonmuscle myosin IIA and IIB have distinct functions in the exocytosis-dependent process of cell membrane repair. *Mol. Biol. Cell* **15**, 688-695.
- Tsai, P.-S., van Haeften, T. and Gadella, B. M. (2011). Preparation of the cortical reaction: maturation-dependent migration of snare proteins, clathrin, and



- complexin to the porcine oocyte's surface blocks membrane traffic until fertilization. *Biol. Reprod.* **84**, 327-335.
- Urven, L. E., Yabe, T. and Pelegri, F.** (2006). A role for non-muscle myosin II function in furrow maturation in the early zebrafish embryo. *J. Cell Sci.* **119**, 4342-4352.
- Webb, S. E., Goulet, C., Chan, C. M., Yuen, M. Y. F. and Miller, A. L.** (2014). Biphasic assembly of the contractile apparatus during the first two cell division cycles in zebrafish embryos. *Zygote* **22**, 218-228.
- Wessel, G. M. and Wong, J. L.** (2009). Cell surface changes in the egg at fertilization. *Mol. Reprod. Dev.* **76**, 942-953.
- Winter, J., Lehmann, T., Suckow, V., Kijas, Z., Kulozik, A., Karlsheuer, V., Hamel, B., Devriendt, K., Opitz, J. M., Lenzner, S. et al.** (2003). Duplication of the Mid1 first exon in a patient with opitz G/Bbb syndrome. *Hum. Genet.* **112**, 249-254.
- Wühr, M., Tan, E. S., Parker, S. K., Detrich, H. W. and Mitchison, T. J.** (2010). A model for cleavage plane determination in early amphibian and fish embryos. *Curr. Biol.* **20**, 2040-2045.
- Yabe, T., Ge, X., Lindeman, R., Nair, S., Runke, G., Mullins, M. and Pelegri, F.** (2009). The maternal-effect gene Cellular Island encodes aurora B kinase and is essential for furrow formation in the early zebrafish embryo. *PLoS Genet.* **5**, e1000518.
- Yates, C. M., Filippis, I., Kelley, L. A. and Sternberg, M. J. E.** (2014). Suspect: enhanced prediction of single amino acid variant (Sav) phenotype using network features. *J. Mol. Biol.* **426**, 2692-2701.
